# Supplementary material for: Calix[4]pyrroles as macrocyclic organocatalysts for the synthesis of cyclic carbonates from epoxides and carbon dioxide
Source: Royal Society of Chemistry journal article supplement (doi:10.1039/c8cy00941d), 2018-01-01
Supplement: c8cy00941d1.pdf [file c8cy00941d1.pdf]

**Calix[4]pyrroles as macrocyclic organocatalysts  
for the synthesis of cyclic carbonates from epoxides and carbon dioxide**

Chihiro Maeda,\* Sota Sasaki, Kazuto Takaishi and Tadashi Ema\*

*Division of Applied Chemistry, Graduate School of Natural Science and Technology,  
Okayama University, Tsushima, Okayama 700-8530, Japan*

**Table of Contents**

|     |                                                                                                             |     |
|-----|-------------------------------------------------------------------------------------------------------------|-----|
| [A] | General methods -----                                                                                       | S2  |
| [B] | Coupling reaction of epoxide with CO <sub>2</sub> -----                                                     | S2  |
| [C] | Time course of the reaction of <b>5a</b> with CO <sub>2</sub> in the presence or absence of <b>1a</b> ----- | S5  |
| [D] | <sup>1</sup> H NMR spectra -----                                                                            | S6  |
| [E] | DFT calculations -----                                                                                      | S10 |

### [A] General methods.

NMR spectra were measured on a JEOL JNM-ECS400 spectrometer, and chemical shifts are reported as the delta scale in ppm using a solvent residual peak as an internal reference ( $\delta = 7.26$  ppm ( $\text{CDCl}_3$ )). Column chromatography was carried out using Fuji Silysia BW-127 ZH (100–270 mesh), and thin layer chromatography (TLC) was performed on Merck silica gel 60 F<sub>254</sub>. Macrocycles **1** and **4** were prepared according to the literature,<sup>1</sup> while macrocycles **2** and **3** were purchased.

### [B] Coupling reaction of epoxide with CO<sub>2</sub>.

**General procedure.** A 30 mL stainless autoclave or 5 mL flask was charged with epoxide **5**, catalyst (amount indicated in the tables), and then CO<sub>2</sub> (initial pressure indicated in the tables). The mixture was stirred at a constant temperature for a reaction time. The reactor was then cooled in an ice bath, and excess CO<sub>2</sub> was released carefully. The yield was determined by using 2-methoxynaphthalene as an internal standard, or the product was purified by silica gel column chromatography (hexane/EtOAc (3:1) for **6a–d** and **6i–k**, hexane/EtOAc (1:1) for **6e–g**, and CHCl<sub>3</sub> for **6h**). Cyclic carbonates **6** were characterized according to the literature.<sup>2,3,4</sup>

#### 4-Butyl-1,3-dioxolan-2-one (**6a**).<sup>2</sup>

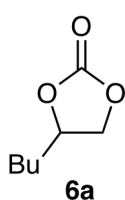

1.41 g (98% yield) (Table 3, entry 1, 15 h); <sup>1</sup>H NMR ( $\text{CDCl}_3$ , 400 MHz)  $\delta$  4.73–4.66 (m, 1H, OCH), 4.52 (t,  $J = 8.2$  Hz, 1H, OCH<sub>2</sub>), 4.07 (t,  $J = 7.8$  Hz, 1H, OCH<sub>2</sub>), 1.86–1.76 (m, 1H, CH<sub>2</sub>), 1.73–1.64 (m, 1H, CH<sub>2</sub>), 1.50–1.30 (m, 4H, CH<sub>2</sub>), 0.93 ppm (t,  $J = 6.6$  Hz, 3H, CH<sub>3</sub>).

#### 4-Octyl-1,3-dioxolan-2-one (**6b**).<sup>2</sup>

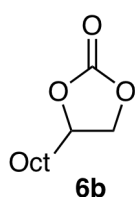

1.94 g (97% yield) (Table 3, entry 2, 15 h); <sup>1</sup>H NMR ( $\text{CDCl}_3$ , 400 MHz)  $\delta$  4.73–4.66 (m, 1H, OCH), 4.52 (t,  $J = 8.2$  Hz, 1H, OCH<sub>2</sub>), 4.06 (dd,  $J = 7.2, 8.0$  Hz, 1H, OCH<sub>2</sub>), 1.84–1.77 (m, 1H, CH<sub>2</sub>), 1.72–1.63 (m, 1H, CH<sub>2</sub>), 1.51–1.20 (m, 12H, CH<sub>2</sub>), 0.88 ppm (t,  $J = 7.0$  Hz, 3H, CH<sub>3</sub>).

#### 4-Dodecyl-1,3-dioxolan-2-one (**6c**).<sup>2</sup>

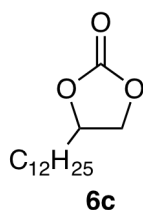

2.31 g (90% yield) (Table 3, entry 3, 24 h); <sup>1</sup>H NMR ( $\text{CDCl}_3$ , 400 MHz)  $\delta$  4.73–4.66 (m, 1H, OCH), 4.52 (t,  $J = 8.0$  Hz, 1H, OCH<sub>2</sub>), 4.06 (dd,  $J = 7.6, 8.2$  Hz, 1H, OCH<sub>2</sub>), 1.84–1.76 (m, 1H, CH<sub>2</sub>), 1.70–1.64 (m, 1H, CH<sub>2</sub>), 1.47–1.24 (m, 20H, CH<sub>2</sub>), 0.88 ppm (t,  $J = 6.8$  Hz, 3H, CH<sub>3</sub>).

#### 4-Phenyl-1,3-dioxolan-2-one (6d).<sup>2</sup>

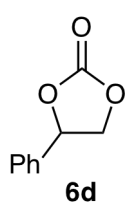

1.61 g (98% yield) (Table 3, entry 4, 15 h); <sup>1</sup>H NMR (CDCl<sub>3</sub>, 400 MHz) δ 7.48–7.41 (m, 3H, Ph), 7.39–7.35 (m, 2H, Ph), 5.68 (t, *J* = 8.0 Hz, 1H, OCH), 4.80 (t, *J* = 8.4 Hz, 1H, OCH<sub>2</sub>), 4.35 ppm (t, *J* = 8.2 Hz, 1H, OCH<sub>2</sub>).

#### 4-(Chloromethyl)-1,3-dioxolan-2-one (6e).<sup>2</sup>

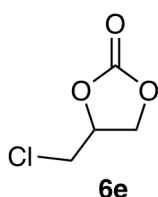

1.27 g (93% yield) (Table 3, entry 5, 15 h); <sup>1</sup>H NMR (CDCl<sub>3</sub>, 400 MHz) δ 4.98–4.92 (m, 1H, OCH), 4.59 (t, *J* = 8.6 Hz, 1H, OCH<sub>2</sub>), 4.43 (dd, *J* = 6.4, 8.8 Hz, 1H, OCH<sub>2</sub>), 3.77 (dd, *J* = 6.0, 11.8 Hz, 1H, CH<sub>2</sub>Cl), 3.73 ppm (dd, *J* = 4.0, 11.6 Hz, 1H, CH<sub>2</sub>Cl).

#### 4-(Ethoxymethyl)-1,3-dioxolan-2-one (6f).<sup>2</sup>

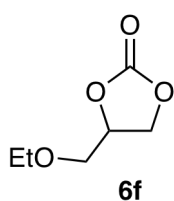

1.40 g (96% yield) (Table 3, entry 6, 15 h); <sup>1</sup>H NMR (CDCl<sub>3</sub>, 400 MHz) δ 4.81–4.77 (m, 1H, OCH), 4.49 (t, *J* = 8.4 Hz, 1H, OCH<sub>2</sub>), 4.39 (dd, *J* = 6.8, 8.4 Hz, 1H, OCH<sub>2</sub>), 3.67 (dd, *J* = 3.6, 10.8 Hz, 1H, CH<sub>2</sub>OEt), 3.61 (dd, *J* = 4.4, 10.2 Hz, 1H, CH<sub>2</sub>OEt), 3.57 (q, *J* = 6.9 Hz, 2H, CH<sub>2</sub>), 1.20 ppm (t, *J* = 7.0 Hz, 3H, CH<sub>3</sub>).

#### 4-(Phenoxymethyl)-1,3-dioxolan-2-one (6g).<sup>2</sup>

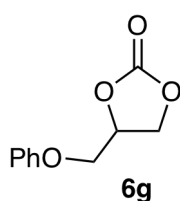

1.91 g (98% yield) (Table 3, entry 7, 15 h); <sup>1</sup>H NMR (CDCl<sub>3</sub>, 400 MHz) δ 7.31 (t, *J* = 8.0 Hz, 2H, Ph), 7.02 (t, *J* = 7.4 Hz, 1H, Ph), 6.92 (d, *J* = 8.0 Hz, 2H, Ph), 5.04–4.98 (m, 1H, OCH), 4.61 (t, *J* = 8.6 Hz, 1H, OCH<sub>2</sub>), 4.53 (dd, *J* = 6.0, 12.0 Hz, 1H, OCH<sub>2</sub>), 4.24 (dd, *J* = 4.4, 10.4 Hz, 1H, CH<sub>2</sub>), 4.17 ppm (dd, *J* = 4.0, 10.6 Hz, 1H, CH<sub>2</sub>).

#### (2-Oxo-1,3-dioxolan-4-yl)methyl methacrylate (6h).<sup>3</sup>

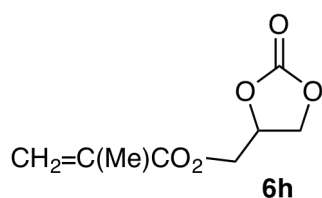

1.78 g (95% yield) (Table 3, entry 8, 15 h); <sup>1</sup>H NMR (CDCl<sub>3</sub>, 400 MHz) δ 6.17–6.16 (m, 1H, C=CH<sub>2</sub>), 5.67–5.66 (m, 1H, C=CH<sub>2</sub>), 5.00–4.95 (m, 1H, OCH), 4.58 (t, *J* = 8.8 Hz, 1H, OCH<sub>2</sub>), 4.44 (dd, *J* = 3.2, 12.8 Hz, 1H, OCH<sub>2</sub>), 4.37–4.32 (m, 2H, OCHCH<sub>2</sub>O), 1.96 ppm (t, *J* = 1.4 Hz, 3H, CH<sub>3</sub>).

***trans*-4,5-Dimethyl-1,3-dioxolan-2-one (6i).**<sup>4</sup>

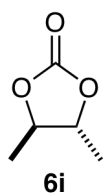

559 mg (48% yield) (Table 3, entry 9, cat. 3 mol%, 48 h); <sup>1</sup>H NMR (CDCl<sub>3</sub>, 400 MHz) δ 4.35–4.28 (m, 2H, OCH), 1.43 ppm (dd, *J* = 1.0, 5.8 Hz, 6H, CH<sub>3</sub>).

**4,5-Trimethylene-1,3-dioxolan-2-one (6j).**<sup>4</sup>

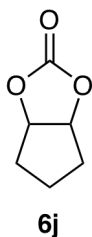

907 mg (71% yield) (Table 3, entry 10, cat. 3 mol%, 48 h); <sup>1</sup>H NMR (CDCl<sub>3</sub>, 400 MHz) δ 5.12–5.09 (m, 2H, OCH), 2.18–2.13 (m, 2H, CH<sub>2</sub>), 1.84–1.62 ppm (m, 4H, CH<sub>2</sub>).

**4,5-Tetramethylene-1,3-dioxolan-2-one (6k).**<sup>4</sup>

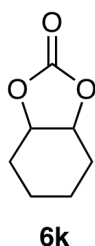

1.12 g (79% yield) (Table 3, entry 11, cat. 3 mol%, 48 h); <sup>1</sup>H NMR (CDCl<sub>3</sub>, 400 MHz) δ 4.70–4.65 (m, 2H, OCH), 1.93–1.86 (m, 4H, CH<sub>2</sub>), 1.63–1.57 (m, 2H, CH<sub>2</sub>), 1.46–1.39 ppm (m, 2H, CH<sub>2</sub>).

## References

- 1 (a) C. J. Borman, R. Custelcean, B. P. Hay, N. L. Bill, J. L. Sessler and B. A. Moyer, *Chem. Commun.*, 2011, **47**, 7611. (b) Y. Han, G.-L. Wang, J.-J. Sun, J. Sun and C.-G. Yan, *Tetrahedron*, 2013, **69**, 10604. (c) S. Dey, K. Pal and S. Sarkar, *Tetrahedron Lett.*, 2008, **49**, 960. (d) T. Ema, D. Tanida and T. Sakai, *Org. Lett.*, 2006, **8**, 3773.
- 2 C. Maeda, S. Sasaki and T. Ema, *ChemCatChem*, 2017, **9**, 946.
- 3 J. Steinbauer, A. Spannenberg and T. Werner, *Green Chem.*, 2017, **19**, 3769.
- 4 C. Maeda, J. Shimonishi, R. Miyazaki, J. Hasegawa and T. Ema, *Chem. Eur. J.*, 2016, **22**, 6556.

**[C] Time course of the reaction of 5a with CO<sub>2</sub> in the presence or absence of 1a.**

To investigate the effect of calix[4]pyrrole **1a** on the reaction under the conditions of Table 3 (entry 1), we monitored the time course of the reaction of **5a** with CO<sub>2</sub> in the presence or absence of **1a**. As shown below (Fig. S1), the reaction with **1a** (red) was much faster than that without **1a** (blue). The former reached 95% in 9 h, whereas the latter reached only 42% in 9 h, and the latter did not reach 80% even after 48 h (not shown). The addition of **1a** is highly beneficial, and it has been confirmed again that this is cooperative catalysis driven by **1a** and TBAI.

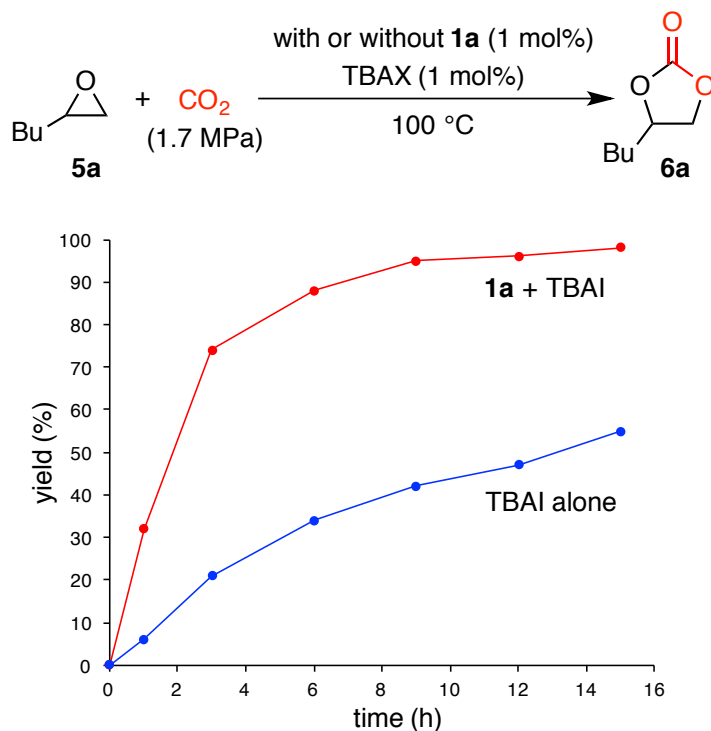

**Fig. S1.** Time course of the reaction of **5a** with CO<sub>2</sub> in the presence or absence of **1a**.

[D]  $^1\text{H}$  NMR spectra.

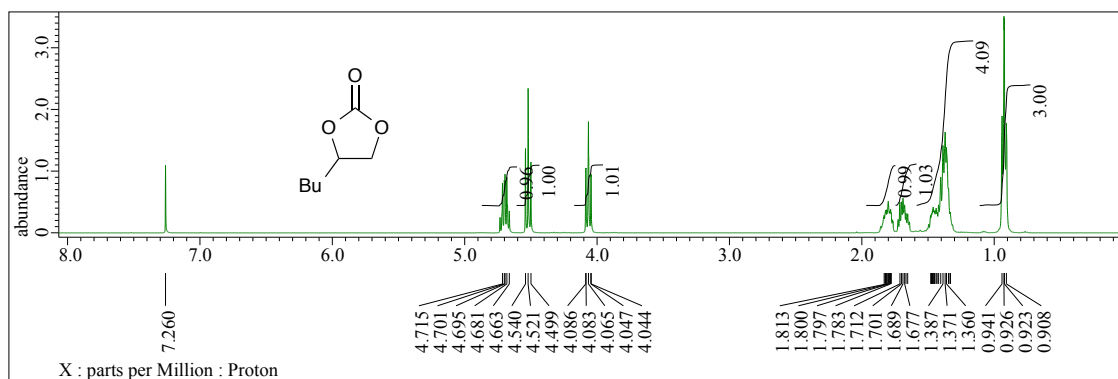

$^1\text{H}$  NMR spectrum of **6a** in  $\text{CDCl}_3$ .

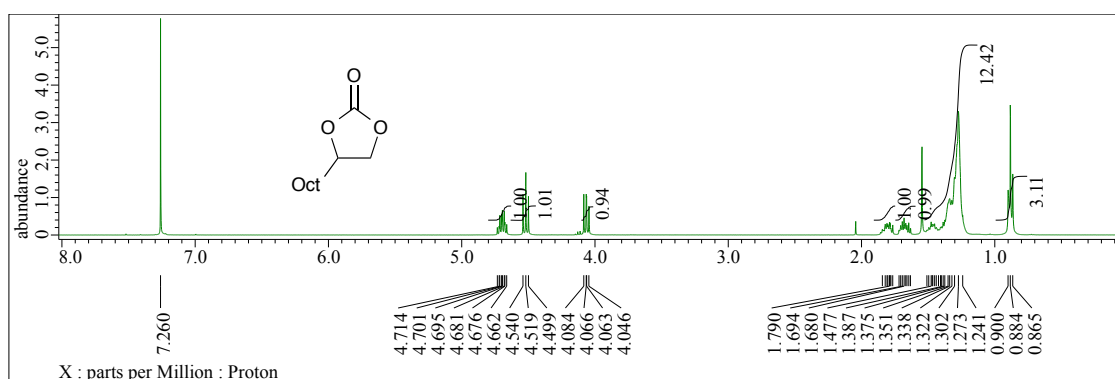

$^1\text{H}$  NMR spectrum of **6b** in  $\text{CDCl}_3$ .

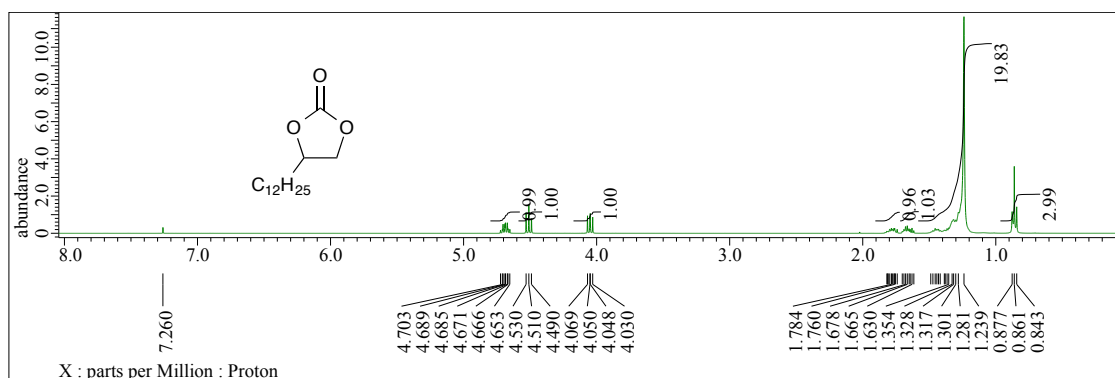

$^1\text{H}$  NMR spectrum of **6c** in  $\text{CDCl}_3$ .

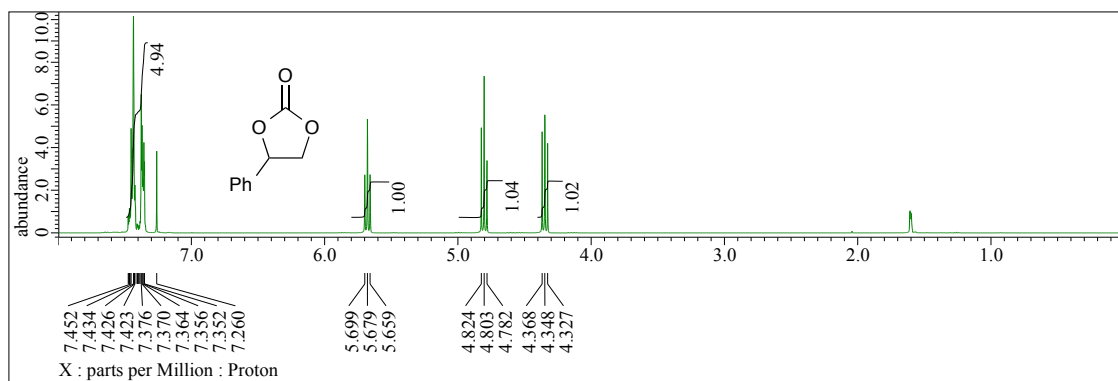

<sup>1</sup>H NMR spectrum of **6d** in CDCl<sub>3</sub>.

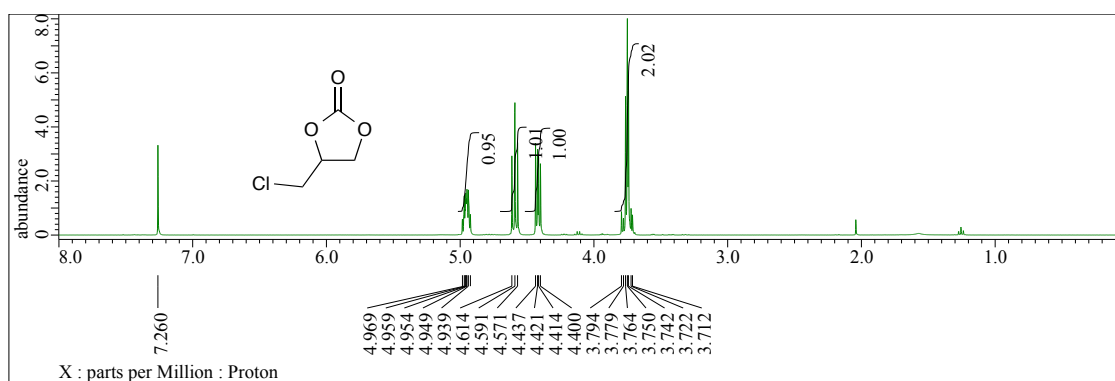

<sup>1</sup>H NMR spectrum of **6e** in CDCl<sub>3</sub>.

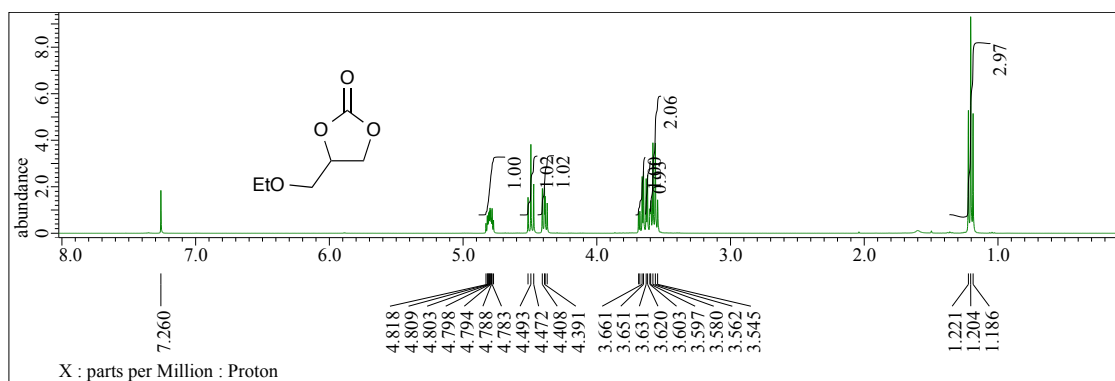

<sup>1</sup>H NMR spectrum of **6f** in CDCl<sub>3</sub>.

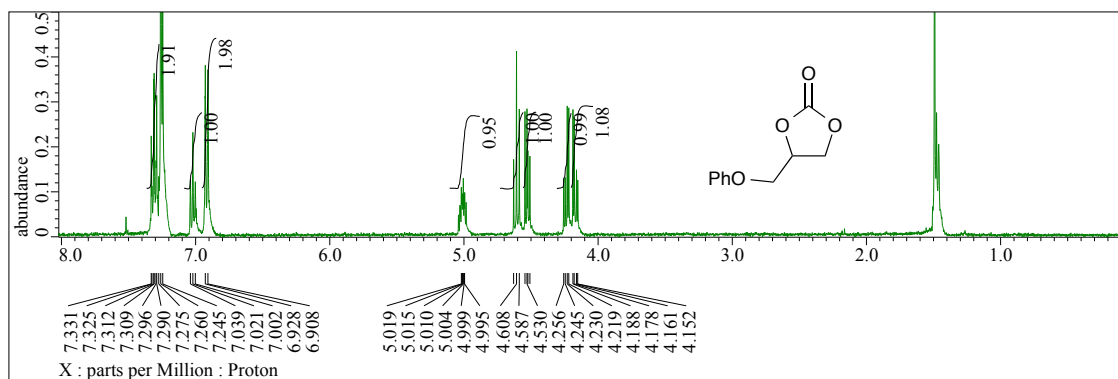

$^1\text{H}$  NMR spectrum of **6g** in  $\text{CDCl}_3$ .

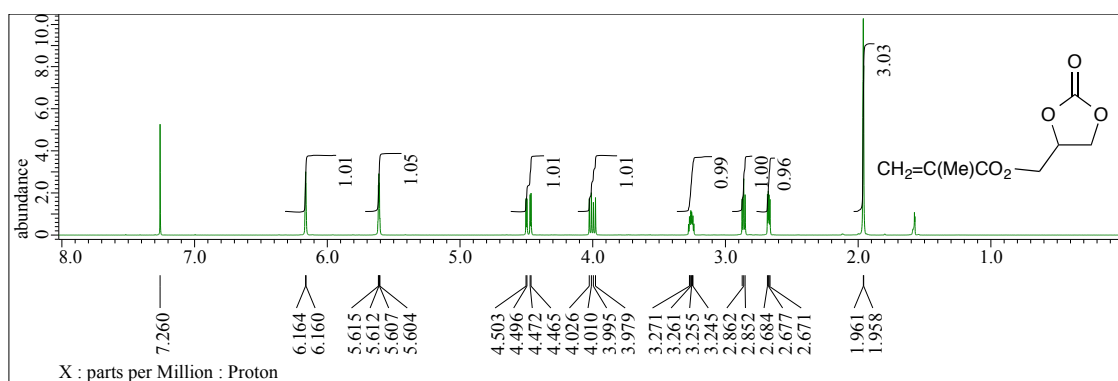

$^1\text{H}$  NMR spectrum of **6h** in  $\text{CDCl}_3$ .

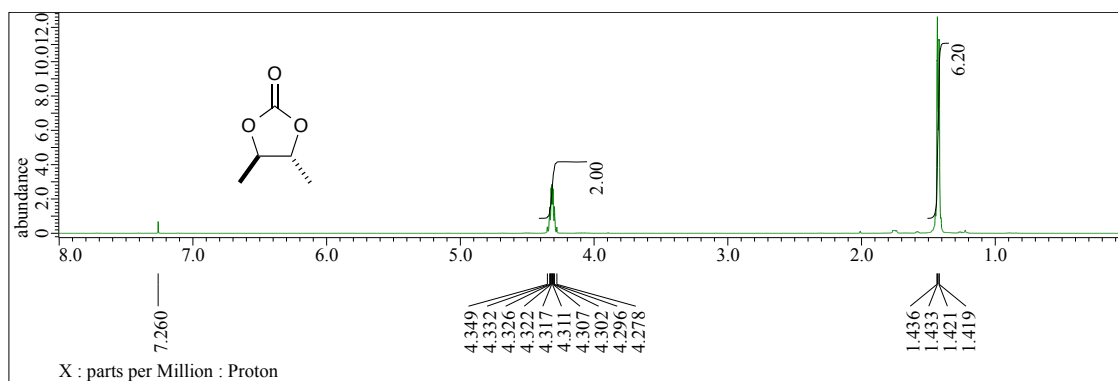

$^1\text{H}$  NMR spectrum of **6i** in  $\text{CDCl}_3$ .



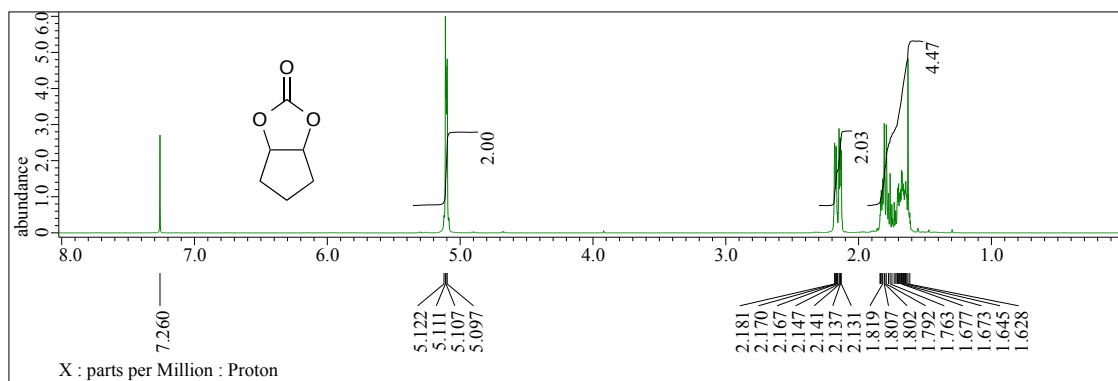

$^1\text{H}$  NMR spectrum of **6j** in  $\text{CDCl}_3$ .

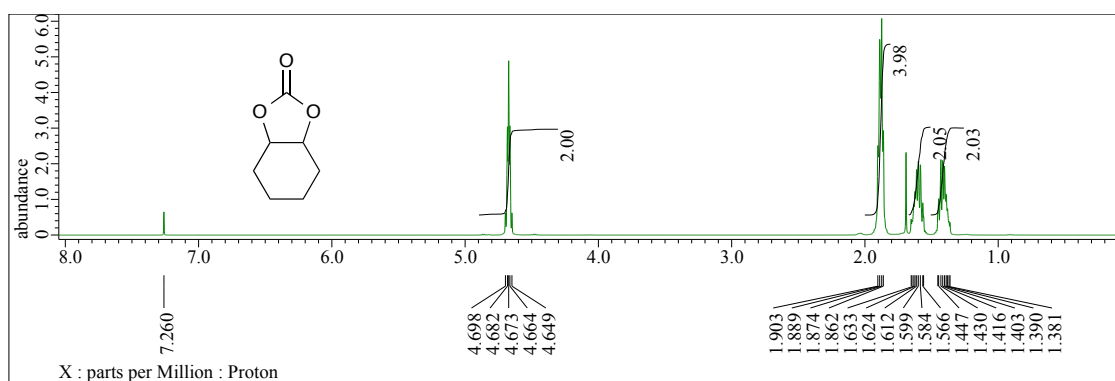

$^1\text{H}$  NMR spectrum of **6k** in  $\text{CDCl}_3$ .

### [E] DFT calculations.

DFT calculations were performed with Gaussian 16 at the B3LYP/6-31G(d) level for the H, C, N, and O atoms and at the B3LYP/LanL2DZ level for the I atom. The harmonic frequency and normal mode were calculated to verify the transition-state structures.

< Reference >

*Gaussian 16*, revision A.03

M. J. Frisch, G. W. Trucks, H. B. Schlegel, G. E. Scuseria, M. A. Robb, J. R. Cheeseman, G. Scalmani, V. Barone, G. A. Petersson, H. Nakatsuji, X. Li, M. Caricato, A. V. Marenich, J. Bloino, B. G. Janesko, R. Gomperts, B. Mennucci, H. P. Hratchian, J. V. Ortiz, A. F. Izmaylov, J. L. Sonnenberg, D. Williams-Young, F. Ding, F. Lipparini, F. Egidi, J. Goings, B. Peng, A. Petrone, T. Henderson, D. Ranasinghe, V. G. Zakrzewski, J. Gao, N. Rega, G. Zheng, W. Liang, M. Hada, M. Ehara, K. Toyota, R. Fukuda, J. Hasegawa, M. Ishida, T. Nakajima, Y. Honda, O. Kitao, H. Nakai, T. Vreven, K. Throssell, J. A. Montgomery, Jr., J. E. Peralta, F. Ogliaro, M. J. Bearpark, J. J. Heyd, E. N. Brothers, K. N. Kudin, V. N. Staroverov, T. A. Keith, R. Kobayashi, J. Normand, K. Raghavachari, A. P. Rendell, J. C. Burant, S. S. Iyengar, J. Tomasi, M. Cossi, J. M. Millam, M. Klene, C. Adamo, R. Cammi, J. W. Ochterski, R. L. Martin, K. Morokuma, O. Farkas, J. B. Foresman and D. J. Fox, Gaussian, Inc., Wallingford CT, 2016.

Cartesian coordinates of reactant **R**.

|   |           |           |           |
|---|-----------|-----------|-----------|
| C | -0.064485 | 2.227136  | 1.573603  |
| C | -0.707614 | 3.155482  | 0.699818  |
| C | -2.074213 | 2.979192  | 0.827658  |
| N | -2.256442 | 1.983494  | 1.761187  |
| C | -1.049160 | 1.502280  | 2.219716  |
| C | -3.877292 | -1.970066 | 2.975544  |
| C | -3.249261 | -0.892578 | 3.663338  |
| C | -2.048959 | -0.627216 | 3.028883  |
| N | -1.949112 | -1.514649 | 1.973782  |
| C | -3.051368 | -2.347115 | 1.930718  |
| C | -1.001492 | 0.437965  | 3.306135  |
| C | -4.224088 | -2.090643 | -2.565897 |
| C | -3.487503 | -3.024927 | -1.777792 |
| C | -3.693829 | -2.710139 | -0.447008 |
| N | -4.539655 | -1.619935 | -0.425318 |
| C | -4.863695 | -1.217115 | -1.702839 |
| C | -3.257051 | -3.390228 | 0.844464  |
| C | -5.636602 | 2.640534  | 0.671312  |
| C | -6.357187 | 1.571225  | 0.065608  |

|   |           |           |           |
|---|-----------|-----------|-----------|
| C | -5.573200 | 1.058258  | -0.953136 |
| N | -4.402768 | 1.789701  | -0.968111 |
| C | -4.425107 | 2.761950  | 0.011388  |
| C | -3.264111 | 3.718720  | 0.232445  |
| C | -5.830394 | -0.067158 | -1.942082 |
| C | -1.967011 | -4.206428 | 0.608658  |
| C | -4.376031 | -4.367989 | 1.287813  |
| C | -1.304723 | 1.107191  | 4.670888  |
| C | 0.407970  | -0.189045 | 3.379381  |
| C | -2.857073 | 4.387581  | -1.101147 |
| C | -3.702256 | 4.829529  | 1.220406  |
| C | -7.279923 | -0.584121 | -1.765689 |
| C | -5.674185 | 0.457798  | -3.388728 |
| H | 1.001336  | 2.106267  | 1.713644  |
| H | -0.221445 | 3.878617  | 0.058659  |
| H | -3.155151 | 1.576284  | 1.987620  |
| H | -4.821043 | -2.429440 | 3.234459  |
| H | -3.630029 | -0.384722 | 4.538455  |
| H | -1.158769 | -1.568512 | 1.339013  |
| H | -4.285867 | -2.074787 | -3.645999 |
| H | -2.872178 | -3.832472 | -2.149787 |
| H | -4.795181 | -1.119578 | 0.416739  |
| H | -5.982560 | 3.263834  | 1.484192  |
| H | -7.348507 | 1.234647  | 0.335511  |
| H | -3.607740 | 1.598598  | -1.578014 |
| H | -1.135209 | -3.591753 | 0.251153  |
| H | -2.145074 | -4.987429 | -0.138913 |
| H | -1.658051 | -4.694560 | 1.539257  |
| H | -5.330365 | -3.850099 | 1.428005  |
| H | -4.522318 | -5.130397 | 0.516111  |
| H | -4.109512 | -4.864674 | 2.227812  |
| H | -2.283049 | 1.598376  | 4.669146  |
| H | -0.548997 | 1.871224  | 4.880163  |
| H | -1.290770 | 0.367778  | 5.479859  |
| H | 0.704428  | -0.656149 | 2.434798  |
| H | 1.150483  | 0.579657  | 3.626092  |
| H | 0.435159  | -0.951668 | 4.165141  |
| H | -2.497935 | 3.654290  | -1.828347 |
| H | -3.714372 | 4.917399  | -1.530242 |

|   |           |           |           |
|---|-----------|-----------|-----------|
| H | -2.056966 | 5.117974  | -0.933348 |
| H | -3.975586 | 4.411317  | 2.194517  |
| H | -4.562536 | 5.384241  | 0.828322  |
| H | -2.875093 | 5.529167  | 1.377846  |
| H | -7.439479 | -0.984227 | -0.759203 |
| H | -7.473237 | -1.389764 | -2.481028 |
| H | -8.005712 | 0.219253  | -1.937069 |
| H | -5.888095 | -0.335804 | -4.113567 |
| H | -6.375823 | 1.279729  | -3.565588 |
| H | -4.660716 | 0.825654  | -3.576683 |
| N | 5.153139  | 0.639029  | -0.765962 |
| C | 4.915615  | -0.508959 | -1.769448 |
| C | 4.499747  | 0.357719  | 0.596620  |
| C | 6.646741  | 0.898739  | -0.638196 |
| C | 4.494887  | 1.899643  | -1.343438 |
| C | 7.074722  | 2.056454  | 0.265686  |
| C | 3.042097  | 1.786080  | -1.810406 |
| C | 5.073980  | -0.776701 | 1.442438  |
| C | 5.852295  | -1.717944 | -1.725693 |
| C | 2.539110  | 3.173388  | -2.253102 |
| C | 1.163124  | 3.114814  | -2.924367 |
| C | 5.334203  | -2.786135 | -2.707628 |
| C | 6.234288  | -4.024870 | -2.745379 |
| C | 4.439669  | -0.741065 | 2.844393  |
| C | 4.922353  | -1.895159 | 3.728087  |
| C | 8.609970  | 2.156881  | 0.312068  |
| C | 9.095431  | 3.304647  | 1.203219  |
| C | -1.460128 | 0.197128  | -3.345938 |
| C | -1.281595 | 0.108273  | -1.895623 |
| O | -1.930530 | 1.259854  | -2.493068 |
| I | 1.665157  | -2.060574 | -0.298032 |
| H | 4.986145  | -0.042313 | -2.756716 |
| H | 3.883691  | -0.836123 | -1.601516 |
| H | 4.553633  | 1.304208  | 1.140743  |
| H | 3.452610  | 0.124779  | 0.382587  |
| H | 7.006751  | 1.060827  | -1.659437 |
| H | 7.091236  | -0.028350 | -0.278729 |
| H | 5.131610  | 2.203322  | -2.181120 |
| H | 4.575042  | 2.664441  | -0.568378 |

|   |           |           |           |
|---|-----------|-----------|-----------|
| H | 6.697681  | 1.908592  | 1.284331  |
| H | 6.669262  | 3.009392  | -0.092522 |
| H | 2.393104  | 1.392830  | -1.021398 |
| H | 2.962347  | 1.090530  | -2.651838 |
| H | 6.165631  | -0.712806 | 1.540394  |
| H | 4.822161  | -1.736255 | 0.981825  |
| H | 5.892389  | -2.154952 | -0.724624 |
| H | 6.876801  | -1.440443 | -2.004614 |
| H | 3.263689  | 3.622292  | -2.948923 |
| H | 2.497329  | 3.839535  | -1.380291 |
| H | 1.196301  | 2.497726  | -3.830629 |
| H | 0.833568  | 4.116946  | -3.219797 |
| H | 0.399498  | 2.696820  | -2.260753 |
| H | 5.263696  | -2.352459 | -3.715430 |
| H | 4.316716  | -3.070639 | -2.413667 |
| H | 7.256137  | -3.772747 | -3.056327 |
| H | 5.844581  | -4.767307 | -3.449690 |
| H | 6.290997  | -4.501977 | -1.759817 |
| H | 3.350104  | -0.795321 | 2.737700  |
| H | 4.668911  | 0.219367  | 3.328971  |
| H | 4.654067  | -2.861998 | 3.287799  |
| H | 4.464045  | -1.843516 | 4.721398  |
| H | 6.011698  | -1.873188 | 3.860654  |
| H | 8.997818  | 2.293338  | -0.706839 |
| H | 9.026147  | 1.207590  | 0.675930  |
| H | 8.724246  | 4.271782  | 0.843911  |
| H | 10.189227 | 3.352281  | 1.218741  |
| H | 8.752049  | 3.177973  | 2.236683  |
| H | -0.617700 | 0.470150  | -3.980243 |
| H | -2.240852 | -0.393831 | -3.819239 |
| H | -1.940105 | -0.543303 | -1.327761 |
| H | -0.311525 | 0.304596  | -1.449443 |

Cartesian coordinates of transition state **II\_TS**.

|   |           |           |          |
|---|-----------|-----------|----------|
| C | -1.328528 | -1.455405 | 3.458073 |
| C | -0.504111 | -0.299676 | 3.607881 |
| C | -1.199766 | 0.786476  | 3.102808 |
| N | -2.416576 | 0.307586  | 2.674041 |
| C | -2.513582 | -1.053965 | 2.868332 |

|   |           |           |           |
|---|-----------|-----------|-----------|
| C | -5.698437 | -0.112824 | -0.240422 |
| C | -5.542763 | -0.401856 | 1.144714  |
| C | -4.432349 | -1.215390 | 1.286633  |
| N | -3.914211 | -1.408890 | 0.019535  |
| C | -4.680572 | -0.753024 | -0.926438 |
| C | -3.797663 | -1.801436 | 2.537369  |
| C | -1.577207 | 1.510954  | -3.581867 |
| C | -2.320899 | 0.305997  | -3.741211 |
| C | -3.249416 | 0.242819  | -2.717177 |
| N | -3.085405 | 1.387422  | -1.965496 |
| C | -2.059785 | 2.163345  | -2.460024 |
| C | -4.357498 | -0.758084 | -2.412248 |
| C | -2.625712 | 3.801132  | 1.813598  |
| C | -2.856200 | 4.134420  | 0.450051  |
| C | -1.916573 | 3.464177  | -0.315119 |
| N | -1.131419 | 2.730782  | 0.556533  |
| C | -1.548326 | 2.932430  | 1.858802  |
| C | -0.871768 | 2.271269  | 3.049900  |
| C | -1.683036 | 3.490900  | -1.818990 |
| C | -3.935635 | -2.170938 | -2.876708 |
| C | -5.624894 | -0.343846 | -3.204721 |
| C | -4.779974 | -1.640040 | 3.726203  |
| C | -3.506704 | -3.307802 | 2.351570  |
| C | 0.661151  | 2.459435  | 2.964666  |
| C | -1.372808 | 2.938242  | 4.356142  |
| C | -2.547062 | 4.611983  | -2.450184 |
| C | -0.195398 | 3.800401  | -2.111463 |
| H | -1.073904 | -2.467518 | 3.740466  |
| H | 0.484398  | -0.271784 | 4.047492  |
| H | -3.115290 | 0.865601  | 2.199445  |
| H | -6.488462 | 0.476566  | -0.684530 |
| H | -6.192345 | -0.071125 | 1.942952  |
| H | -3.088093 | -1.963612 | -0.184948 |
| H | -0.770785 | 1.852784  | -4.217239 |
| H | -2.181962 | -0.435837 | -4.515877 |
| H | -3.597887 | 1.584038  | -1.114856 |
| H | -3.175086 | 4.178421  | 2.664864  |
| H | -3.612225 | 4.811537  | 0.077839  |
| H | -0.386206 | 2.074174  | 0.280695  |

|   |           |           |           |
|---|-----------|-----------|-----------|
| H | -3.013352 | -2.511861 | -2.395959 |
| H | -3.765016 | -2.178619 | -3.958929 |
| H | -4.730188 | -2.891914 | -2.655805 |
| H | -5.944008 | 0.671388  | -2.947762 |
| H | -5.408163 | -0.361245 | -4.277616 |
| H | -6.454344 | -1.030549 | -3.000841 |
| H | -4.996905 | -0.586067 | 3.928634  |
| H | -4.333749 | -2.067788 | 4.629561  |
| H | -5.725542 | -2.155680 | 3.523245  |
| H | -2.777075 | -3.496874 | 1.558496  |
| H | -3.105979 | -3.733883 | 3.278366  |
| H | -4.433544 | -3.838671 | 2.108900  |
| H | 1.065553  | 1.961033  | 2.078833  |
| H | 0.906799  | 3.526697  | 2.918858  |
| H | 1.150059  | 2.036425  | 3.850014  |
| H | -2.451774 | 2.803223  | 4.480781  |
| H | -1.156064 | 4.012906  | 4.357186  |
| H | -0.878769 | 2.477646  | 5.217660  |
| H | -3.614262 | 4.424420  | -2.294710 |
| H | -2.369739 | 4.648102  | -3.529798 |
| H | -2.300873 | 5.589485  | -2.019290 |
| H | -0.019031 | 3.860878  | -3.191525 |
| H | 0.078976  | 4.763611  | -1.667032 |
| H | 0.457106  | 3.023829  | -1.699683 |
| N | 4.627193  | 0.356606  | -0.481229 |
| C | 3.741173  | 0.157649  | -1.730825 |
| C | 3.918713  | -0.122689 | 0.801228  |
| C | 5.967792  | -0.330771 | -0.693284 |
| C | 4.886461  | 1.862069  | -0.345629 |
| C | 7.042561  | -0.082664 | 0.368236  |
| C | 3.666854  | 2.784039  | -0.304235 |
| C | 3.972853  | -1.616953 | 1.127922  |
| C | 3.568617  | -1.259737 | -2.285164 |
| C | 4.112381  | 4.206820  | 0.080411  |
| C | 2.951130  | 5.205912  | 0.075856  |
| C | 2.911178  | -1.195817 | -3.678340 |
| C | 2.574069  | -2.589369 | -4.218560 |
| C | 3.267529  | -1.880374 | 2.473213  |
| C | 3.171354  | -3.376046 | 2.791744  |

|   |           |           |           |
|---|-----------|-----------|-----------|
| C | 8.256611  | -0.996448 | 0.123591  |
| C | 9.383472  | -0.757405 | 1.133482  |
| C | 0.089337  | -0.104566 | -1.026839 |
| C | 0.425132  | -0.976026 | 0.086394  |
| O | 0.874115  | 0.795433  | -0.260504 |
| I | -0.401890 | -3.601967 | -0.607144 |
| H | 4.204161  | 0.791666  | -2.494731 |
| H | 2.766815  | 0.573770  | -1.455698 |
| H | 4.379057  | 0.439789  | 1.617985  |
| H | 2.882448  | 0.207775  | 0.693518  |
| H | 6.319706  | 0.001429  | -1.675350 |
| H | 5.760456  | -1.397097 | -0.763862 |
| H | 5.534317  | 2.127394  | -1.187781 |
| H | 5.466971  | 1.980741  | 0.570967  |
| H | 6.646788  | -0.274577 | 1.372877  |
| H | 7.376756  | 0.960617  | 0.350194  |
| H | 2.920651  | 2.426595  | 0.410771  |
| H | 3.168238  | 2.810234  | -1.278021 |
| H | 5.006968  | -1.974303 | 1.204678  |
| H | 3.487631  | -2.212703 | 0.349318  |
| H | 2.932773  | -1.862317 | -1.630353 |
| H | 4.525501  | -1.784436 | -2.385393 |
| H | 4.894632  | 4.550003  | -0.612226 |
| H | 4.573522  | 4.184490  | 1.078031  |
| H | 2.506877  | 5.292444  | -0.921881 |
| H | 3.292076  | 6.201433  | 0.379677  |
| H | 2.157494  | 4.894953  | 0.764267  |
| H | 3.585767  | -0.673150 | -4.371954 |
| H | 1.994008  | -0.596246 | -3.624646 |
| H | 3.472115  | -3.215382 | -4.294286 |
| H | 2.130556  | -2.520256 | -5.217471 |
| H | 1.856599  | -3.098892 | -3.565740 |
| H | 2.259548  | -1.448871 | 2.453326  |
| H | 3.814207  | -1.359472 | 3.272456  |
| H | 2.558659  | -3.895494 | 2.046614  |
| H | 2.706841  | -3.533045 | 3.770715  |
| H | 4.162345  | -3.847089 | 2.812171  |
| H | 8.635414  | -0.834448 | -0.894974 |
| H | 7.936623  | -2.046165 | 0.170091  |



|   |           |           |           |
|---|-----------|-----------|-----------|
| H | 9.750927  | 0.274444  | 1.083363  |
| H | 10.230716 | -1.422761 | 0.938235  |
| H | 9.043760  | -0.942244 | 2.159421  |
| H | 0.497616  | -0.371352 | -2.006968 |
| H | -0.964216 | 0.163266  | -1.121848 |
| H | -0.154830 | -0.953973 | 0.998887  |
| H | 1.397221  | -1.434185 | 0.120474  |

Cartesian coordinates of intermediate **II**.

|   |           |           |           |
|---|-----------|-----------|-----------|
| C | -2.079495 | -1.644289 | 3.380977  |
| C | -0.962133 | -0.775039 | 3.557707  |
| C | -1.315945 | 0.473726  | 3.075646  |
| N | -2.616254 | 0.372126  | 2.636108  |
| C | -3.096614 | -0.910320 | 2.798343  |
| C | -6.011299 | 0.715916  | -0.387439 |
| C | -5.970072 | 0.406825  | 1.002354  |
| C | -4.984664 | -0.543315 | 1.198019  |
| N | -4.432983 | -0.803816 | -0.042950 |
| C | -5.050442 | -0.049185 | -1.023466 |
| C | -4.534647 | -1.265073 | 2.456790  |
| C | -1.275373 | 1.141667  | -3.511796 |
| C | -2.325157 | 0.193101  | -3.682540 |
| C | -3.294503 | 0.460305  | -2.732900 |
| N | -2.852733 | 1.549890  | -2.012547 |
| C | -1.618525 | 1.969076  | -2.457348 |
| C | -4.669021 | -0.144452 | -2.491141 |
| C | -1.903195 | 3.668769  | 1.759055  |
| C | -2.011103 | 4.047178  | 0.393124  |
| C | -1.172093 | 3.221665  | -0.339324 |
| N | -0.566765 | 2.351880  | 0.548295  |
| C | -1.000326 | 2.618561  | 1.833404  |
| C | -0.573405 | 1.802992  | 3.046102  |
| C | -0.933878 | 3.181020  | -1.842935 |
| C | -4.680292 | -1.622516 | -2.948241 |
| C | -5.710902 | 0.633017  | -3.335221 |
| C | -5.446789 | -0.844386 | 3.636744  |
| C | -4.666437 | -2.794688 | 2.263164  |
| C | 0.947650  | 1.537586  | 3.024908  |
| C | -0.916722 | 2.587994  | 4.338304  |

|   |           |           |           |
|---|-----------|-----------|-----------|
| C | -1.521777 | 4.460711  | -2.491042 |
| C | 0.578146  | 3.131249  | -2.150845 |
| H | -2.125247 | -2.691045 | 3.648728  |
| H | -0.007768 | -1.041227 | 3.992061  |
| H | -3.107711 | 1.116904  | 2.158103  |
| H | -6.689814 | 1.406752  | -0.867785 |
| H | -6.611609 | 0.820284  | 1.767752  |
| H | -3.638503 | -1.411098 | -0.200630 |
| H | -0.366307 | 1.200167  | -4.095151 |
| H | -2.358511 | -0.598992 | -4.418262 |
| H | -3.317737 | 1.924391  | -1.195543 |
| H | -2.413819 | 4.131125  | 2.592724  |
| H | -2.617976 | 4.850486  | -0.001326 |
| H | 0.117820  | 1.598654  | 0.290584  |
| H | -3.931980 | -2.219568 | -2.417710 |
| H | -4.460996 | -1.693790 | -4.019209 |
| H | -5.667308 | -2.063546 | -2.772317 |
| H | -5.724699 | 1.694573  | -3.067964 |
| H | -5.450879 | 0.559323  | -4.395768 |
| H | -6.718103 | 0.225121  | -3.190251 |
| H | -5.380862 | 0.232028  | 3.825694  |
| H | -5.131691 | -1.364702 | 4.546572  |
| H | -6.493858 | -1.096893 | 3.433071  |
| H | -4.013607 | -3.161946 | 1.465219  |
| H | -4.397445 | -3.323847 | 3.184150  |
| H | -5.700841 | -3.051597 | 2.011730  |
| H | 1.224369  | 0.958106  | 2.139078  |
| H | 1.492444  | 2.489344  | 3.021647  |
| H | 1.250880  | 0.981803  | 3.920248  |
| H | -1.994425 | 2.755187  | 4.431007  |
| H | -0.414290 | 3.562368  | 4.349154  |
| H | -0.594360 | 2.014703  | 5.213844  |
| H | -2.604624 | 4.523228  | -2.343253 |
| H | -1.334806 | 4.444369  | -3.569808 |
| H | -1.063147 | 5.361748  | -2.067027 |
| H | 0.749162  | 3.114429  | -3.233741 |
| H | 1.067265  | 4.024658  | -1.745704 |
| H | 1.033170  | 2.241182  | -1.706086 |
| N | 4.787139  | 0.303898  | -0.373743 |

|   |           |           |           |
|---|-----------|-----------|-----------|
| C | 3.927781  | 0.290583  | -1.656432 |
| C | 4.076710  | -0.442904 | 0.777089  |
| C | 6.170298  | -0.246544 | -0.671780 |
| C | 4.948661  | 1.769123  | 0.047605  |
| C | 7.206937  | -0.138251 | 0.449838  |
| C | 3.673417  | 2.603444  | 0.171433  |
| C | 4.259512  | -1.959798 | 0.861532  |
| C | 3.915469  | -0.990089 | -2.491803 |
| C | 3.988069  | 3.914742  | 0.914476  |
| C | 2.798000  | 4.879570  | 0.941114  |
| C | 3.104250  | -0.752553 | -3.779986 |
| C | 2.986140  | -2.017510 | -4.635794 |
| C | 3.658420  | -2.472479 | 2.184374  |
| C | 3.711141  | -3.999079 | 2.300189  |
| C | 8.483364  | -0.913520 | 0.079993  |
| C | 9.572055  | -0.799292 | 1.151782  |
| C | 0.412453  | -0.616493 | -0.750407 |
| C | 0.295007  | -1.800200 | 0.208015  |
| O | 1.234552  | 0.331939  | -0.162279 |
| I | -0.979815 | -3.473337 | -0.629497 |
| H | 4.317787  | 1.115494  | -2.262281 |
| H | 2.906415  | 0.515277  | -1.310725 |
| H | 4.454118  | 0.013665  | 1.695969  |
| H | 3.008163  | -0.200974 | 0.653911  |
| H | 6.518852  | 0.287353  | -1.562038 |
| H | 6.037213  | -1.290802 | -0.950920 |
| H | 5.624165  | 2.216616  | -0.689519 |
| H | 5.471210  | 1.745523  | 1.005862  |
| H | 6.803595  | -0.536533 | 1.388665  |
| H | 7.470684  | 0.908737  | 0.636022  |
| H | 2.885418  | 2.055232  | 0.693786  |
| H | 3.274153  | 2.833334  | -0.820660 |
| H | 5.314770  | -2.257276 | 0.827903  |
| H | 3.759868  | -2.458854 | 0.024770  |
| H | 3.453291  | -1.809624 | -1.932838 |
| H | 4.924893  | -1.313189 | -2.775099 |
| H | 4.850065  | 4.411675  | 0.444381  |
| H | 4.294907  | 3.679672  | 1.943765  |
| H | 2.523347  | 5.195546  | -0.071593 |

|   |           |           |           |
|---|-----------|-----------|-----------|
| H | 3.038328  | 5.779210  | 1.518388  |
| H | 1.914400  | 4.413008  | 1.389441  |
| H | 3.581097  | 0.046846  | -4.364920 |
| H | 2.102346  | -0.393434 | -3.516021 |
| H | 3.972933  | -2.399499 | -4.926565 |
| H | 2.422379  | -1.816621 | -5.552893 |
| H | 2.462759  | -2.812853 | -4.092832 |
| H | 2.619865  | -2.131307 | 2.269975  |
| H | 4.202961  | -2.018923 | 3.024662  |
| H | 3.128486  | -4.477284 | 1.504321  |
| H | 3.298528  | -4.332543 | 3.258143  |
| H | 4.741314  | -4.370800 | 2.232177  |
| H | 8.871272  | -0.541485 | -0.878421 |
| H | 8.233182  | -1.971341 | -0.079338 |
| H | 9.871163  | 0.244373  | 1.305301  |
| H | 10.465600 | -1.363327 | 0.864668  |
| H | 9.224464  | -1.192080 | 2.114682  |
| H | 0.794885  | -0.990828 | -1.722686 |
| H | -0.602972 | -0.239195 | -0.962788 |
| H | -0.194392 | -1.548028 | 1.148051  |
| H | 1.249208  | -2.295020 | 0.389052  |

Cartesian coordinates of intermediate **II**·CO<sub>2</sub>.

|   |           |           |           |
|---|-----------|-----------|-----------|
| C | -2.761571 | -3.512748 | -0.245550 |
| C | -1.520572 | -3.517087 | 0.458196  |
| C | -1.613655 | -2.593226 | 1.485313  |
| N | -2.879315 | -2.056903 | 1.420160  |
| C | -3.590679 | -2.590249 | 0.366340  |
| C | -5.930439 | 1.298542  | 1.166631  |
| C | -6.041097 | -0.107218 | 1.366449  |
| C | -5.267401 | -0.735635 | 0.408011  |
| N | -4.691970 | 0.263907  | -0.354970 |
| C | -5.090196 | 1.511837  | 0.088612  |
| C | -5.042366 | -2.210895 | 0.122563  |
| C | -1.041046 | 3.848697  | -0.141987 |
| C | -2.215972 | 3.812837  | -0.947445 |
| C | -3.174886 | 3.088412  | -0.262851 |
| N | -2.603127 | 2.705432  | 0.931838  |
| C | -1.299694 | 3.140703  | 1.018602  |

|   |           |           |           |
|---|-----------|-----------|-----------|
| C | -4.636958 | 2.802511  | -0.573045 |
| C | -1.549217 | -0.232083 | 4.082394  |
| C | -1.504541 | 1.185341  | 3.984451  |
| C | -0.789387 | 1.504873  | 2.841014  |
| N | -0.407460 | 0.317748  | 2.244340  |
| C | -0.860272 | -0.749362 | 2.996024  |
| C | -0.647238 | -2.201268 | 2.594556  |
| C | -0.460500 | 2.872046  | 2.259146  |
| C | -4.841425 | 2.716697  | -2.104375 |
| C | -5.496621 | 3.974255  | -0.033334 |
| C | -5.943527 | -3.052563 | 1.061126  |
| C | -5.431807 | -2.532248 | -1.339986 |
| C | 0.803232  | -2.427645 | 2.113195  |
| C | -0.905858 | -3.115170 | 3.819990  |
| C | -0.766620 | 3.966548  | 3.312874  |
| C | 1.038617  | 2.950461  | 1.893814  |
| H | -3.010703 | -4.117192 | -1.106936 |
| H | -0.661477 | -4.135551 | 0.234620  |
| H | -3.199513 | -1.297483 | 2.007752  |
| H | -6.434268 | 2.065781  | 1.737496  |
| H | -6.643300 | -0.600079 | 2.116627  |
| H | -4.021445 | 0.103594  | -1.096339 |
| H | -0.111907 | 4.344068  | -0.389789 |
| H | -2.338108 | 4.265565  | -1.922129 |
| H | -3.046412 | 2.099992  | 1.610760  |
| H | -2.012766 | -0.803852 | 4.874623  |
| H | -1.928611 | 1.888304  | 4.688120  |
| H | 0.122672  | 0.234469  | 1.343069  |
| H | -4.222738 | 1.935268  | -2.556658 |
| H | -4.572013 | 3.665965  | -2.580133 |
| H | -5.891834 | 2.507182  | -2.333480 |
| H | -5.364633 | 4.098034  | 1.046353  |
| H | -5.188025 | 4.907036  | -0.515555 |
| H | -6.560834 | 3.807314  | -0.236575 |
| H | -5.698506 | -2.873752 | 2.113121  |
| H | -5.790592 | -4.116936 | 0.857460  |
| H | -7.002332 | -2.814430 | 0.906632  |
| H | -4.802287 | -1.995963 | -2.056694 |
| H | -5.324559 | -3.604225 | -1.539644 |

|   |           |           |           |
|---|-----------|-----------|-----------|
| H | -6.476099 | -2.254841 | -1.518297 |
| H | 1.016231  | -1.825756 | 1.224106  |
| H | 1.505932  | -2.158817 | 2.911354  |
| H | 0.953198  | -3.487070 | 1.872609  |
| H | -1.939349 | -3.030486 | 4.170175  |
| H | -0.238068 | -2.855995 | 4.650074  |
| H | -0.735794 | -4.160639 | 3.542185  |
| H | -1.828435 | 3.978666  | 3.578650  |
| H | -0.515975 | 4.950673  | 2.903516  |
| H | -0.183762 | 3.805735  | 4.227455  |
| H | 1.291552  | 3.951010  | 1.522040  |
| H | 1.650250  | 2.754553  | 2.782605  |
| H | 1.278895  | 2.215081  | 1.120533  |
| N | 4.321055  | 0.304708  | -0.572587 |
| C | 3.557792  | 1.393161  | -1.347286 |
| C | 5.825960  | 0.363346  | -0.792841 |
| C | 3.924557  | 0.420760  | 0.903131  |
| C | 3.779251  | -1.045008 | -1.080028 |
| C | 4.441721  | -0.673398 | 1.839849  |
| C | 4.031574  | -1.377484 | -2.552378 |
| C | 6.646616  | 1.317136  | 0.082137  |
| C | 3.891630  | 2.857075  | -1.064981 |
| C | 3.560503  | -2.812664 | -2.852521 |
| C | 3.750093  | -3.196266 | -4.323487 |
| C | 2.922034  | 3.759871  | -1.850918 |
| C | 3.202303  | 5.249973  | -1.632294 |
| C | 8.118728  | 1.310706  | -0.366165 |
| C | 9.000463  | 2.212999  | 0.503304  |
| C | 4.160872  | -0.280496 | 3.301451  |
| C | 4.590338  | -1.364706 | 4.294621  |
| H | 2.509477  | 1.171402  | -1.103238 |
| H | 3.741530  | 1.184729  | -2.402577 |
| H | 6.196045  | -0.655560 | -0.648357 |
| H | 5.965346  | 0.612230  | -1.848052 |
| H | 2.830834  | 0.431580  | 0.883980  |
| H | 4.281447  | 1.396457  | 1.234830  |
| H | 2.704009  | -0.994584 | -0.857495 |
| H | 4.248758  | -1.804680 | -0.453702 |
| H | 5.519464  | -0.843364 | 1.714413  |

|   |           |           |           |
|---|-----------|-----------|-----------|
| H | 3.943881  | -1.625644 | 1.632579  |
| H | 5.095812  | -1.297058 | -2.809439 |
| H | 3.487808  | -0.691963 | -3.211604 |
| H | 6.595218  | 1.011670  | 1.132709  |
| H | 6.260921  | 2.338593  | 0.030645  |
| H | 4.917658  | 3.099582  | -1.368262 |
| H | 3.799203  | 3.091168  | 0.001528  |
| H | 2.500613  | -2.907151 | -2.582186 |
| H | 4.109092  | -3.515876 | -2.211664 |
| H | 3.178451  | -2.532937 | -4.983018 |
| H | 3.410268  | -4.220781 | -4.508710 |
| H | 4.804890  | -3.135579 | -4.618920 |
| H | 1.892552  | 3.526941  | -1.553215 |
| H | 2.994391  | 3.526302  | -2.922258 |
| H | 3.100575  | 5.521844  | -0.574679 |
| H | 2.500371  | 5.867508  | -2.202569 |
| H | 4.217546  | 5.518463  | -1.950347 |
| H | 8.182474  | 1.634543  | -1.414198 |
| H | 8.505824  | 0.282575  | -0.337922 |
| H | 8.658275  | 3.254174  | 0.470172  |
| H | 10.040543 | 2.192738  | 0.161230  |
| H | 8.987328  | 1.890884  | 1.551293  |
| H | 3.088796  | -0.077040 | 3.418461  |
| H | 4.681731  | 0.659194  | 3.533972  |
| H | 4.051849  | -2.302320 | 4.113304  |
| H | 4.383528  | -1.056469 | 5.324928  |
| H | 5.664229  | -1.575976 | 4.217188  |
| C | 0.033452  | 0.410146  | -1.131294 |
| C | -0.270004 | -0.883179 | -1.885522 |
| O | 0.996250  | 0.121178  | -0.176503 |
| I | -1.788796 | -0.582807 | -3.535341 |
| H | 0.358359  | 1.177672  | -1.865303 |
| H | -0.907543 | 0.795292  | -0.699895 |
| H | -0.717678 | -1.652301 | -1.257242 |
| H | 0.596901  | -1.273874 | -2.420450 |
| C | 3.027870  | -5.036790 | 0.604996  |
| O | 2.128616  | -5.780018 | 0.640503  |
| O | 3.936685  | -4.297707 | 0.566369  |

Cartesian coordinates of transition state **I2\_TS**.

|   |           |           |           |
|---|-----------|-----------|-----------|
| C | 3.327238  | 3.158562  | -1.261361 |
| C | 2.298476  | 3.607973  | -0.380680 |
| C | 2.483299  | 2.983259  | 0.839476  |
| N | 3.603315  | 2.190126  | 0.711682  |
| C | 4.124312  | 2.270319  | -0.562386 |
| C | 5.920460  | -1.626769 | 1.041545  |
| C | 6.273659  | -0.271118 | 0.780687  |
| C | 5.470394  | 0.188661  | -0.247364 |
| N | 4.642526  | -0.860280 | -0.601483 |
| C | 4.906287  | -1.977169 | 0.169231  |
| C | 5.409002  | 1.544132  | -0.932283 |
| C | 0.445128  | -3.205715 | 0.631315  |
| C | 1.534775  | -3.644909 | -0.177168 |
| C | 2.695605  | -3.121454 | 0.359729  |
| N | 2.325436  | -2.394845 | 1.472574  |
| C | 0.959020  | -2.420419 | 1.647782  |
| C | 4.159058  | -3.287010 | -0.017755 |
| C | 2.379099  | 1.217950  | 3.909415  |
| C | 1.968580  | -0.130620 | 4.101829  |
| C | 1.022659  | -0.425017 | 3.135235  |
| N | 0.856464  | 0.710929  | 2.363116  |
| C | 1.676938  | 1.723222  | 2.829576  |
| C | 1.756792  | 3.090940  | 2.172325  |
| C | 0.313599  | -1.736455 | 2.844572  |
| C | 4.272953  | -3.759386 | -1.486157 |
| C | 4.793593  | -4.369228 | 0.891391  |
| C | 6.616386  | 2.399426  | -0.471010 |
| C | 5.494954  | 1.373012  | -2.466960 |
| C | 0.338541  | 3.656433  | 1.962611  |
| C | 2.542878  | 4.061162  | 3.089718  |
| C | 0.434618  | -2.670998 | 4.075363  |
| C | -1.183393 | -1.487814 | 2.567520  |
| H | 3.459295  | 3.455073  | -2.292943 |
| H | 1.505048  | 4.299053  | -0.629205 |
| H | 3.927834  | 1.546289  | 1.421749  |
| H | 6.378633  | -2.276585 | 1.773934  |
| H | 7.048741  | 0.293797  | 1.279301  |
| H | 3.909516  | -0.804861 | -1.298075 |



|   |           |           |           |
|---|-----------|-----------|-----------|
| H | -0.599118 | -3.440491 | 0.476762  |
| H | 1.467140  | -4.261627 | -1.062509 |
| H | 2.952939  | -1.815134 | 2.015612  |
| H | 3.093710  | 1.761585  | 4.511527  |
| H | 2.314660  | -0.800390 | 4.876904  |
| H | 0.213500  | 0.790933  | 1.564868  |
| H | 3.804981  | -3.053013 | -2.178750 |
| H | 3.781056  | -4.729834 | -1.616520 |
| H | 5.326778  | -3.870686 | -1.762110 |
| H | 4.725113  | -4.092203 | 1.948418  |
| H | 4.262720  | -5.317090 | 0.758192  |
| H | 5.850052  | -4.520761 | 0.641581  |
| H | 6.590025  | 2.574791  | 0.609319  |
| H | 6.585326  | 3.374079  | -0.967902 |
| H | 7.563953  | 1.907430  | -0.719625 |
| H | 4.643774  | 0.812312  | -2.865596 |
| H | 5.506405  | 2.351047  | -2.960358 |
| H | 6.416486  | 0.845308  | -2.734990 |
| H | -0.263903 | 2.987935  | 1.345607  |
| H | -0.162682 | 3.778592  | 2.929383  |
| H | 0.379012  | 4.638003  | 1.476773  |
| H | 3.573800  | 3.725186  | 3.241135  |
| H | 2.060641  | 4.150751  | 4.070094  |
| H | 2.581490  | 5.051823  | 2.625311  |
| H | 1.479208  | -2.916716 | 4.290380  |
| H | -0.091441 | -3.610557 | 3.875998  |
| H | -0.000815 | -2.203767 | 4.966309  |
| H | -1.696992 | -2.440940 | 2.390437  |
| H | -1.648257 | -1.011385 | 3.438474  |
| H | -1.323242 | -0.838833 | 1.696827  |
| N | -4.791132 | -0.035740 | -0.435949 |
| C | -4.230665 | -1.346046 | -1.009148 |
| C | -6.310376 | -0.030992 | -0.391305 |
| C | -4.157880 | 0.241649  | 0.939279  |
| C | -4.335904 | 1.098656  | -1.373539 |
| C | -4.663883 | 1.483650  | 1.672932  |
| C | -4.644116 | 0.938170  | -2.863296 |
| C | -7.006682 | -1.020467 | 0.543823  |
| C | -4.047901 | -2.543599 | -0.072754 |

|   |            |           |           |
|---|------------|-----------|-----------|
| C | -4.193283  | 2.197372  | -3.627724 |
| C | -4.432398  | 2.079616  | -5.136233 |
| C | -3.647647  | -3.781393 | -0.897316 |
| C | -3.425409  | -5.019873 | -0.022823 |
| C | -8.513892  | -0.716051 | 0.611730  |
| C | -9.273139  | -1.706170 | 1.500701  |
| C | -3.863526  | 1.667758  | 2.975543  |
| C | -4.310224  | 2.902950  | 3.763334  |
| H | -3.255665  | -1.086626 | -1.425488 |
| H | -4.894496  | -1.609622 | -1.836847 |
| H | -6.590182  | 0.988999  | -0.118164 |
| H | -6.645906  | -0.197485 | -1.417234 |
| H | -3.078024  | 0.339461  | 0.732588  |
| H | -4.342145  | -0.645741 | 1.544644  |
| H | -3.260767  | 1.174303  | -1.192338 |
| H | -4.808304  | 2.005395  | -0.992472 |
| H | -5.732371  | 1.403272  | 1.917239  |
| H | -4.525021  | 2.382306  | 1.065571  |
| H | -5.716421  | 0.784147  | -3.041971 |
| H | -4.118700  | 0.071945  | -3.279298 |
| H | -6.584633  | -0.968660 | 1.553855  |
| H | -6.870130  | -2.047213 | 0.188916  |
| H | -4.957319  | -2.769613 | 0.492117  |
| H | -3.257278  | -2.333153 | 0.652846  |
| H | -3.128296  | 2.375636  | -3.436496 |
| H | -4.731622  | 3.071985  | -3.236590 |
| H | -3.871329  | 1.239221  | -5.561379 |
| H | -4.109525  | 2.988975  | -5.653659 |
| H | -5.494576  | 1.924495  | -5.363406 |
| H | -2.731486  | -3.560575 | -1.460562 |
| H | -4.427665  | -3.993661 | -1.642369 |
| H | -2.618367  | -4.856993 | 0.700494  |
| H | -3.151182  | -5.885316 | -0.635090 |
| H | -4.331658  | -5.280089 | 0.537946  |
| H | -8.936999  | -0.734246 | -0.402293 |
| H | -8.661347  | 0.305207  | 0.988821  |
| H | -9.176285  | -2.732221 | 1.126421  |
| H | -10.340305 | -1.463323 | 1.535080  |
| H | -8.893396  | -1.688528 | 2.529110  |

|   |           |           |           |
|---|-----------|-----------|-----------|
| H | -2.800333 | 1.753226  | 2.724431  |
| H | -3.969064 | 0.771229  | 3.602825  |
| H | -4.169115 | 3.816029  | 3.173454  |
| H | -3.728516 | 3.009363  | 4.685207  |
| H | -5.369938 | 2.841736  | 4.042468  |
| C | -0.836292 | 0.168119  | -1.111470 |
| C | 0.655931  | 0.402051  | -1.329053 |
| O | -1.259559 | 0.909853  | -0.026678 |
| I | 1.389166  | -0.590261 | -3.226953 |
| H | -1.354650 | 0.439185  | -2.060113 |
| H | -0.986872 | -0.926808 | -0.984701 |
| H | 1.274094  | -0.043023 | -0.550541 |
| H | 0.907152  | 1.449061  | -1.477849 |
| C | -1.759737 | 3.241546  | -0.776208 |
| O | -1.133471 | 3.204879  | -1.768404 |
| O | -2.467737 | 3.506972  | 0.125256  |

Cartesian coordinates of intermediate **I2**.

|   |          |           |           |
|---|----------|-----------|-----------|
| C | 1.018499 | 2.879237  | -2.715632 |
| C | 0.850463 | 3.618592  | -1.508508 |
| C | 1.824723 | 3.197077  | -0.616573 |
| N | 2.571445 | 2.249322  | -1.272169 |
| C | 2.087822 | 2.017045  | -2.535162 |
| C | 5.492628 | -1.208322 | -2.260808 |
| C | 5.073978 | -0.082856 | -3.019732 |
| C | 3.719915 | 0.098385  | -2.799723 |
| N | 3.314133 | -0.890793 | -1.915870 |
| C | 4.388286 | -1.701584 | -1.588562 |
| C | 2.747481 | 1.038493  | -3.493718 |
| C | 2.269595 | -2.882687 | 2.404286  |
| C | 2.632055 | -3.575852 | 1.215177  |
| C | 3.511250 | -2.775164 | 0.510277  |
| N | 3.707133 | -1.640654 | 1.265979  |
| C | 2.937384 | -1.671559 | 2.405665  |
| C | 4.234415 | -2.994499 | -0.801892 |
| C | 4.109345 | 2.857963  | 2.339124  |
| C | 4.315713 | 1.675405  | 3.098122  |
| C | 3.293111 | 0.793241  | 2.798141  |
| N | 2.472758 | 1.415881  | 1.869388  |

|   |          |           |           |
|---|----------|-----------|-----------|
| C | 2.963433 | 2.683035  | 1.584533  |
| C | 2.198448 | 3.707621  | 0.762177  |
| C | 2.965509 | -0.552176 | 3.427499  |
| C | 3.430702 | -4.002907 | -1.662318 |
| C | 5.633855 | -3.595774 | -0.517251 |
| C | 3.508300 | 1.854629  | -4.568828 |
| C | 1.658427 | 0.192983  | -4.203957 |
| C | 0.911095 | 4.094610  | 1.534673  |
| C | 3.063347 | 4.983533  | 0.595424  |
| C | 4.029654 | -0.882791 | 4.504592  |
| C | 1.580758 | -0.465198 | 4.116509  |
| H | 0.437745 | 2.985984  | -3.622878 |
| H | 0.135534 | 4.413316  | -1.335837 |
| H | 3.303035 | 1.700912  | -0.841451 |
| H | 6.488096 | -1.628994 | -2.240215 |
| H | 5.693874 | 0.506525  | -3.680644 |
| H | 2.414273 | -0.893112 | -1.422062 |
| H | 1.586981 | -3.232424 | 3.166812  |
| H | 2.273565 | -4.548475 | 0.907294  |
| H | 4.234440 | -0.835209 | 0.959873  |
| H | 4.720290 | 3.749088  | 2.370122  |
| H | 5.112830 | 1.504515  | 3.807616  |
| H | 1.766176 | 0.921901  | 1.307195  |
| H | 2.419759 | -3.630210 | -1.851573 |
| H | 3.353102 | -4.972176 | -1.155968 |
| H | 3.934060 | -4.158208 | -2.622410 |
| H | 6.251166 | -2.904527 | 0.066229  |
| H | 5.524251 | -4.520621 | 0.057628  |
| H | 6.162539 | -3.828882 | -1.448758 |
| H | 4.291448 | 2.470410  | -4.114943 |
| H | 2.813723 | 2.523436  | -5.086949 |
| H | 3.970895 | 1.191897  | -5.308696 |
| H | 1.089941 | -0.400257 | -3.482101 |
| H | 0.958401 | 0.838725  | -4.747267 |
| H | 2.124058 | -0.490289 | -4.922705 |
| H | 0.279685 | 3.213286  | 1.686257  |
| H | 1.171270 | 4.502414  | 2.517265  |
| H | 0.334210 | 4.852415  | 0.990036  |
| H | 3.998937 | 4.755910  | 0.075107  |

|   |           |           |           |
|---|-----------|-----------|-----------|
| H | 3.305992  | 5.427890  | 1.567345  |
| H | 2.517399  | 5.724208  | 0.002663  |
| H | 5.029822  | -0.951703 | 4.064328  |
| H | 3.797056  | -1.849386 | 4.961784  |
| H | 4.048139  | -0.119666 | 5.291644  |
| H | 1.364347  | -1.390112 | 4.663596  |
| H | 1.568494  | 0.364533  | 4.832152  |
| H | 0.786732  | -0.318266 | 3.378422  |
| N | -3.560179 | 1.981640  | 0.489091  |
| C | -4.719073 | 1.029826  | 0.815388  |
| C | -2.508747 | 1.309403  | -0.414368 |
| C | -4.115197 | 3.256331  | -0.135016 |
| C | -2.875175 | 2.358765  | 1.816360  |
| C | -3.116097 | 4.379982  | -0.414859 |
| C | -2.546941 | 1.221316  | 2.784939  |
| C | -3.006646 | 0.810000  | -1.770602 |
| C | -5.905377 | 0.948149  | -0.152265 |
| C | -1.870288 | 1.800945  | 4.043171  |
| C | -1.779461 | 0.767985  | 5.171188  |
| C | -6.853201 | -0.181726 | 0.291268  |
| C | -8.102187 | -0.275613 | -0.590926 |
| C | -1.834220 | 0.333199  | -2.645920 |
| C | -3.827782 | 5.565318  | -1.091702 |
| C | -2.874557 | 6.729180  | -1.382179 |
| C | -2.311798 | -0.150083 | -4.019095 |
| H | -5.097312 | 1.350563  | 1.789455  |
| H | -4.259225 | 0.048408  | 0.947906  |
| H | -1.711653 | 2.044390  | -0.546605 |
| H | -2.085681 | 0.485245  | 0.169263  |
| H | -4.893205 | 3.607415  | 0.550773  |
| H | -4.603536 | 2.960956  | -1.063254 |
| H | -1.961344 | 2.885867  | 1.538960  |
| H | -3.552636 | 3.076299  | 2.292594  |
| H | -2.307927 | 4.029006  | -1.065456 |
| H | -2.649259 | 4.729333  | 0.512489  |
| H | -1.884750 | 0.481746  | 2.319914  |
| H | -3.462601 | 0.705477  | 3.096641  |
| H | -3.547859 | 1.595667  | -2.315208 |
| H | -3.703089 | -0.026336 | -1.637598 |

|   |           |           |           |
|---|-----------|-----------|-----------|
| H | -5.583795 | 0.760071  | -1.179419 |
| H | -6.460875 | 1.893373  | -0.156975 |
| H | -2.429156 | 2.678863  | 4.401041  |
| H | -0.864526 | 2.155140  | 3.784819  |
| H | -2.777976 | 0.451600  | 5.497791  |
| H | -1.258584 | 1.182690  | 6.040876  |
| H | -1.233481 | -0.123082 | 4.845970  |
| H | -7.152957 | -0.020463 | 1.336127  |
| H | -6.314020 | -1.137900 | 0.269124  |
| H | -8.684538 | 0.653171  | -0.558984 |
| H | -8.753855 | -1.090032 | -0.258264 |
| H | -7.836055 | -0.468607 | -1.636858 |
| H | -1.297136 | -0.474358 | -2.137262 |
| H | -1.110096 | 1.147106  | -2.762874 |
| H | -4.649526 | 5.914643  | -0.450892 |
| H | -4.289988 | 5.226499  | -2.029137 |
| H | -2.423731 | 7.113229  | -0.459543 |
| H | -3.403824 | 7.557426  | -1.864901 |
| H | -2.060516 | 6.419263  | -2.047661 |
| H | -1.465403 | -0.483177 | -4.628151 |
| H | -3.008626 | -0.993348 | -3.929128 |
| H | -2.826209 | 0.647523  | -4.570810 |
| C | 0.074560  | -1.027985 | 0.203308  |
| C | -0.748862 | -3.262689 | -0.200201 |
| C | -2.154408 | -3.067825 | -0.747490 |
| O | 0.995131  | -0.233279 | -0.087767 |
| O | -0.835211 | -0.936439 | 1.060944  |
| O | 0.068673  | -2.176162 | -0.626142 |
| I | -3.498401 | -4.742572 | -0.193018 |
| H | -0.293762 | -4.168296 | -0.610312 |
| H | -0.767087 | -3.322051 | 0.889358  |
| H | -2.179543 | -3.038485 | -1.836356 |
| H | -2.615861 | -2.183867 | -0.314850 |

Cartesian coordinates of transition state **P\_TS**.

|   |          |          |           |
|---|----------|----------|-----------|
| C | 1.022527 | 3.026878 | -2.197891 |
| C | 0.838347 | 3.548470 | -0.883808 |
| C | 1.894981 | 3.108651 | -0.102580 |
| N | 2.704605 | 2.361867 | -0.924234 |

|   |          |           |           |
|---|----------|-----------|-----------|
| C | 2.185580 | 2.274969  | -2.193294 |
| C | 5.649795 | -0.881263 | -2.476277 |
| C | 5.239671 | 0.361415  | -3.031907 |
| C | 3.883336 | 0.504514  | -2.798887 |
| N | 3.468611 | -0.624756 | -2.109753 |
| C | 4.538119 | -1.481352 | -1.912421 |
| C | 2.915075 | 1.556070  | -3.316048 |
| C | 2.438880 | -3.225628 | 1.875191  |
| C | 2.749840 | -3.717171 | 0.574995  |
| C | 3.664441 | -2.852196 | 0.003251  |
| N | 3.927461 | -1.877669 | 0.940747  |
| C | 3.170747 | -2.069286 | 2.074785  |
| C | 4.370563 | -2.879406 | -1.337112 |
| C | 4.271622 | 2.434323  | 2.716607  |
| C | 4.545247 | 1.155606  | 3.273335  |
| C | 3.545782 | 0.290915  | 2.864616  |
| N | 2.675113 | 1.019876  | 2.070365  |
| C | 3.108978 | 2.333875  | 1.974076  |
| C | 2.281212 | 3.433247  | 1.328187  |
| C | 3.279124 | -1.149318 | 3.274917  |
| C | 3.543859 | -3.733506 | -2.331510 |
| C | 5.763125 | -3.536346 | -1.164937 |
| C | 3.698278 | 2.609356  | -4.140100 |
| C | 1.884455 | 0.873488  | -4.251682 |
| C | 0.997146 | 3.647084  | 2.169916  |
| C | 3.089325 | 4.756218  | 1.333753  |
| C | 4.431180 | -1.642454 | 4.186461  |
| C | 1.956885 | -1.210806 | 4.080667  |
| H | 0.389943 | 3.207215  | -3.057241 |
| H | 0.047667 | 4.214057  | -0.561187 |
| H | 3.516015 | 1.846336  | -0.611249 |
| H | 6.645320 | -1.300329 | -2.516901 |
| H | 5.867642 | 1.055979  | -3.571982 |
| H | 2.570466 | -0.710471 | -1.627851 |
| H | 1.750681 | -3.670646 | 2.580728  |
| H | 2.342741 | -4.605214 | 0.111286  |
| H | 4.491801 | -1.057700 | 0.766708  |
| H | 4.851565 | 3.333286  | 2.871195  |
| H | 5.371402 | 0.907753  | 3.924560  |

|   |           |           |           |
|---|-----------|-----------|-----------|
| H | 1.969204  | 0.596236  | 1.460731  |
| H | 2.532622  | -3.332048 | -2.446672 |
| H | 3.464207  | -4.769270 | -1.981628 |
| H | 4.031920  | -3.740583 | -3.311580 |
| H | 6.396037  | -2.954802 | -0.486346 |
| H | 5.645287  | -4.539173 | -0.742860 |
| H | 6.279580  | -3.624990 | -2.127585 |
| H | 4.445537  | 3.117358  | -3.521904 |
| H | 3.007243  | 3.366261  | -4.524137 |
| H | 4.209214  | 2.141795  | -4.989180 |
| H | 1.299047  | 0.122683  | -3.712663 |
| H | 1.192207  | 1.610603  | -4.675407 |
| H | 2.402859  | 0.376903  | -5.078743 |
| H | 0.393391  | 2.733858  | 2.187802  |
| H | 1.263575  | 3.903119  | 3.200737  |
| H | 0.388563  | 4.463472  | 1.761244  |
| H | 4.020452  | 4.648912  | 0.768576  |
| H | 3.338020  | 5.063305  | 2.355856  |
| H | 2.499058  | 5.551013  | 0.866989  |
| H | 5.392507  | -1.607683 | 3.663466  |
| H | 4.245175  | -2.679743 | 4.481059  |
| H | 4.507605  | -1.031492 | 5.093456  |
| H | 1.788320  | -2.221338 | 4.470092  |
| H | 2.003074  | -0.520807 | 4.930084  |
| H | 1.102958  | -0.945277 | 3.449907  |
| N | -3.650175 | 1.771243  | 0.488453  |
| C | -4.776347 | 0.748408  | 0.737885  |
| C | -2.558641 | 1.212823  | -0.439268 |
| C | -4.256904 | 3.055795  | -0.067103 |
| C | -3.000221 | 2.097964  | 1.844712  |
| C | -3.311045 | 4.239298  | -0.277743 |
| C | -2.579791 | 0.920166  | 2.726934  |
| C | -3.012921 | 0.755826  | -1.826144 |
| C | -5.952746 | 0.684846  | -0.242109 |
| C | -2.059244 | 1.451288  | 4.077043  |
| C | -1.719395 | 0.317676  | 5.049940  |
| C | -6.876054 | -0.485403 | 0.148758  |
| C | -8.104679 | -0.580030 | -0.761182 |
| C | -1.806224 | 0.377376  | -2.704684 |



|   |           |           |           |
|---|-----------|-----------|-----------|
| C | -4.081705 | 5.431834  | -0.873365 |
| C | -3.183257 | 6.652309  | -1.098515 |
| C | -2.237110 | -0.028645 | -4.117896 |
| H | -5.168553 | 0.988414  | 1.729640  |
| H | -4.286843 | -0.225020 | 0.802886  |
| H | -1.800808 | 1.995432  | -0.520802 |
| H | -2.095253 | 0.390839  | 0.108467  |
| H | -5.052714 | 3.330591  | 0.632280  |
| H | -4.728260 | 2.790622  | -1.012770 |
| H | -2.130905 | 2.718313  | 1.620233  |
| H | -3.735701 | 2.716797  | 2.369918  |
| H | -2.494695 | 3.969845  | -0.956672 |
| H | -2.852700 | 4.551362  | 0.667076  |
| H | -1.799188 | 0.320002  | 2.246867  |
| H | -3.428981 | 0.256879  | 2.925026  |
| H | -3.578716 | 1.547282  | -2.335065 |
| H | -3.674374 | -0.114401 | -1.747760 |
| H | -5.616651 | 0.542103  | -1.272276 |
| H | -6.528750 | 1.617442  | -0.214508 |
| H | -2.815095 | 2.108904  | 4.531060  |
| H | -1.168563 | 2.070109  | 3.909424  |
| H | -2.602745 | -0.293859 | 5.270436  |
| H | -1.344298 | 0.717753  | 5.997914  |
| H | -0.949232 | -0.340606 | 4.635150  |
| H | -7.200074 | -0.361452 | 1.191859  |
| H | -6.311452 | -1.425321 | 0.103402  |
| H | -8.710347 | 0.333951  | -0.719068 |
| H | -8.741795 | -1.418709 | -0.462992 |
| H | -7.811655 | -0.743044 | -1.804923 |
| H | -1.254714 | -0.448187 | -2.241434 |
| H | -1.106732 | 1.220175  | -2.750367 |
| H | -4.910312 | 5.703223  | -0.204626 |
| H | -4.539159 | 5.131264  | -1.825881 |
| H | -2.740725 | 6.999313  | -0.157369 |
| H | -3.753668 | 7.483712  | -1.525436 |
| H | -2.363022 | 6.420419  | -1.787674 |
| H | -1.365495 | -0.292742 | -4.725473 |
| H | -2.904511 | -0.898474 | -4.097654 |
| H | -2.764535 | 0.787614  | -4.628157 |

|   |           |           |           |
|---|-----------|-----------|-----------|
| C | 0.274783  | -1.175124 | 0.053702  |
| C | -0.874721 | -3.139713 | -0.501926 |
| C | -1.960806 | -2.522333 | 0.352193  |
| O | 1.199343  | -0.375896 | -0.126914 |
| O | -0.570205 | -1.203261 | 1.019306  |
| O | 0.061493  | -2.132369 | -0.915919 |
| I | -4.108650 | -3.986248 | -0.306599 |
| H | -1.271969 | -3.570985 | -1.418601 |
| H | -0.347570 | -3.913404 | 0.065263  |
| H | -2.524177 | -1.692314 | -0.033297 |
| H | -2.120445 | -2.817273 | 1.374245  |

Cartesian coordinates of product **P**.

|   |          |           |           |
|---|----------|-----------|-----------|
| C | 0.325543 | 2.864301  | -1.226585 |
| C | 0.321430 | 3.122223  | 0.175844  |
| C | 1.614675 | 2.962537  | 0.640563  |
| N | 2.385759 | 2.634651  | -0.451845 |
| C | 1.622526 | 2.550262  | -1.592903 |
| C | 5.508303 | 0.381856  | -2.965926 |
| C | 4.783992 | 1.582809  | -3.208766 |
| C | 3.474168 | 1.375317  | -2.815494 |
| N | 3.397145 | 0.077849  | -2.339841 |
| C | 4.630841 | -0.542313 | -2.428202 |
| C | 2.249190 | 2.264356  | -2.946957 |
| C | 3.428413 | -3.316041 | 1.130625  |
| C | 3.620500 | -3.483190 | -0.272149 |
| C | 4.297542 | -2.372331 | -0.742607 |
| N | 4.529967 | -1.561861 | 0.347660  |
| C | 3.991893 | -2.105314 | 1.492487  |
| C | 4.820951 | -2.019487 | -2.121652 |
| C | 4.559750 | 2.307713  | 2.860952  |
| C | 5.092856 | 1.012200  | 3.108869  |
| C | 4.150076 | 0.080756  | 2.714140  |
| N | 3.060596 | 0.788386  | 2.232804  |
| C | 3.298252 | 2.150542  | 2.317662  |
| C | 2.230425 | 3.186514  | 2.007884  |
| C | 4.151551 | -1.433441 | 2.844146  |
| C | 4.067393 | -2.855965 | -3.186007 |
| C | 6.327592 | -2.372207 | -2.197590 |

|   |           |           |           |
|---|-----------|-----------|-----------|
| C | 2.660788  | 3.608956  | -3.597638 |
| C | 1.211732  | 1.573004  | -3.866085 |
| C | 1.127037  | 3.112617  | 3.092462  |
| C | 2.857645  | 4.603207  | 2.050857  |
| C | 5.490954  | -1.890769 | 3.475077  |
| C | 2.997140  | -1.870883 | 3.779584  |
| H | -0.522189 | 2.920163  | -1.896827 |
| H | -0.528822 | 3.420325  | 0.774046  |
| H | 3.364569  | 2.384195  | -0.409669 |
| H | 6.551323  | 0.209962  | -3.191598 |
| H | 5.178189  | 2.486851  | -3.651335 |
| H | 2.605562  | -0.290103 | -1.817835 |
| H | 2.943356  | -4.013788 | 1.799969  |
| H | 3.302462  | -4.328425 | -0.867060 |
| H | 4.942146  | -0.640067 | 0.298240  |
| H | 5.042112  | 3.248773  | 3.084823  |
| H | 6.053354  | 0.792319  | 3.552990  |
| H | 2.297019  | 0.371828  | 1.704754  |
| H | 2.990199  | -2.667642 | -3.146290 |
| H | 4.235690  | -3.927738 | -3.029508 |
| H | 4.428262  | -2.595905 | -4.186173 |
| H | 6.910319  | -1.789123 | -1.476829 |
| H | 6.468689  | -3.433186 | -1.969409 |
| H | 6.726304  | -2.178473 | -3.199757 |
| H | 3.395981  | 4.137715  | -2.982348 |
| H | 1.782032  | 4.253123  | -3.701213 |
| H | 3.093005  | 3.446621  | -4.591424 |
| H | 0.872490  | 0.623298  | -3.441205 |
| H | 0.334746  | 2.213654  | -4.014840 |
| H | 1.656176  | 1.372395  | -4.846443 |
| H | 0.640849  | 2.131502  | 3.093541  |
| H | 1.566526  | 3.277134  | 4.081250  |
| H | 0.361464  | 3.879985  | 2.926337  |
| H | 3.663269  | 4.702518  | 1.316390  |
| H | 3.267331  | 4.822538  | 3.043182  |
| H | 2.093036  | 5.351580  | 1.819913  |
| H | 6.342381  | -1.602557 | 2.850055  |
| H | 5.497543  | -2.980741 | 3.571398  |
| H | 5.626880  | -1.452175 | 4.470251  |

|   |           |           |           |
|---|-----------|-----------|-----------|
| H | 3.018258  | -2.954563 | 3.940800  |
| H | 3.098075  | -1.379665 | 4.752981  |
| H | 2.021464  | -1.611683 | 3.357331  |
| N | -4.148616 | 1.143335  | 0.690842  |
| C | -5.360367 | 0.222423  | 0.957146  |
| C | -3.258586 | 0.606775  | -0.443874 |
| C | -4.643653 | 2.555515  | 0.419831  |
| C | -3.300404 | 1.164138  | 1.967778  |
| C | -3.582473 | 3.640828  | 0.232828  |
| C | -2.780891 | -0.184225 | 2.469441  |
| C | -3.788501 | 0.708124  | -1.872056 |
| C | -6.620146 | 0.408332  | 0.109233  |
| C | -2.085641 | -0.003601 | 3.830543  |
| C | -1.492863 | -1.316574 | 4.352302  |
| C | -7.640731 | -0.681599 | 0.488704  |
| C | -8.942993 | -0.559438 | -0.308335 |
| C | -2.713951 | 0.194353  | -2.847727 |
| C | -4.239611 | 4.964471  | -0.197038 |
| C | -3.221422 | 6.099163  | -0.349552 |
| C | -3.179719 | 0.249160  | -4.305727 |
| H | -5.613949 | 0.385333  | 2.009255  |
| H | -4.990802 | -0.800852 | 0.833355  |
| H | -2.307857 | 1.139113  | -0.351638 |
| H | -3.100633 | -0.450292 | -0.212548 |
| H | -5.298959 | 2.806510  | 1.260368  |
| H | -5.265963 | 2.493829  | -0.472214 |
| H | -2.456355 | 1.825523  | 1.764670  |
| H | -3.930672 | 1.639445  | 2.727179  |
| H | -2.851363 | 3.342624  | -0.526677 |
| H | -3.026796 | 3.809199  | 1.161927  |
| H | -2.065698 | -0.609283 | 1.758835  |
| H | -3.590387 | -0.913490 | 2.570034  |
| H | -4.056458 | 1.738525  | -2.140692 |
| H | -4.677968 | 0.082831  | -1.988326 |
| H | -6.396863 | 0.318823  | -0.957357 |
| H | -7.073011 | 1.394948  | 0.268977  |
| H | -2.804179 | 0.395109  | 4.561156  |
| H | -1.287729 | 0.746734  | 3.740712  |
| H | -2.270682 | -2.078500 | 4.480294  |

|   |           |           |           |
|---|-----------|-----------|-----------|
| H | -1.003587 | -1.168152 | 5.321009  |
| H | -0.748295 | -1.712303 | 3.652958  |
| H | -7.860731 | -0.616722 | 1.563983  |
| H | -7.186726 | -1.664893 | 0.316880  |
| H | -9.429835 | 0.409971  | -0.141566 |
| H | -9.651243 | -1.342955 | -0.018848 |
| H | -8.758297 | -0.661930 | -1.384240 |
| H | -2.469036 | -0.840683 | -2.580235 |
| H | -1.794180 | 0.782524  | -2.727439 |
| H | -5.003023 | 5.251462  | 0.539594  |
| H | -4.769830 | 4.814287  | -1.147486 |
| H | -2.712592 | 6.306245  | 0.599251  |
| H | -3.710675 | 7.023353  | -0.674703 |
| H | -2.452928 | 5.846987  | -1.089334 |
| H | -2.396796 | -0.115966 | -4.978963 |
| H | -4.067680 | -0.375081 | -4.458577 |
| H | -3.430372 | 1.273411  | -4.610374 |
| C | 0.733254  | -1.584647 | -0.122996 |
| C | -0.250331 | -3.455040 | -0.992470 |
| C | -0.339278 | -3.489440 | 0.539711  |
| O | 1.334167  | -0.534166 | -0.062682 |
| O | 0.128534  | -2.172613 | 0.925338  |
| O | 0.566596  | -2.287234 | -1.253654 |
| I | -4.128825 | -3.187359 | -0.389246 |
| H | -1.232328 | -3.310487 | -1.450358 |
| H | 0.254042  | -4.321629 | -1.422310 |
| H | -1.367132 | -3.610075 | 0.886272  |
| H | 0.327785  | -4.224198 | 0.997406  |

Cartesian coordinates of transition state **II**\_TS in a 1,2-alternate conformation.

|   |           |           |           |
|---|-----------|-----------|-----------|
| C | -1.933768 | 0.814905  | -3.575294 |
| C | -2.126872 | -0.596987 | -3.558613 |
| C | -3.290119 | -0.855710 | -2.855476 |
| N | -3.787420 | 0.364679  | -2.455252 |
| C | -2.979974 | 1.400042  | -2.882778 |
| C | -3.267883 | 2.853721  | -2.540150 |
| C | -5.094695 | 0.919912  | 3.356559  |
| C | -4.217282 | 2.038548  | 3.360111  |
| C | -3.080118 | 1.685162  | 2.657437  |

|   |           |           |           |
|---|-----------|-----------|-----------|
| N | -3.259078 | 0.382472  | 2.224763  |
| C | -4.482467 | -0.100901 | 2.650480  |
| C | -1.841588 | 2.500766  | 2.317182  |
| C | -6.280468 | -1.985950 | -1.143556 |
| C | -6.521212 | -1.818902 | 0.249099  |
| C | -5.293575 | -1.711807 | 0.882065  |
| N | -4.325496 | -1.813797 | -0.094981 |
| C | -4.908548 | -1.985006 | -1.334497 |
| C | -4.071261 | -2.135767 | -2.592323 |
| C | -4.955809 | -1.521884 | 2.358139  |
| C | -0.574830 | 1.605020  | 2.376001  |
| C | -1.674387 | 3.623758  | 3.362874  |
| C | -4.794572 | 3.074517  | -2.357431 |
| C | -2.793865 | 3.746847  | -3.706072 |
| C | -3.094331 | -3.326300 | -2.440938 |
| C | -4.999243 | -2.413592 | -3.800665 |
| C | -6.221434 | -1.801368 | 3.193349  |
| C | -3.868808 | -2.542934 | 2.788961  |
| C | -1.577782 | 4.376127  | 0.465626  |
| C | -1.947260 | 4.462868  | -0.907889 |
| C | -2.557977 | 3.272235  | -1.258728 |
| N | -2.555351 | 2.479024  | -0.129127 |
| C | -1.969385 | 3.133810  | 0.934864  |
| H | -1.115349 | 1.342974  | -4.046596 |
| H | -1.490868 | -1.336448 | -4.026703 |
| H | -4.653681 | 0.452520  | -1.941756 |
| H | -6.066084 | 0.871261  | 3.828482  |
| H | -4.405221 | 2.997083  | 3.824402  |
| H | -2.563236 | -0.167059 | 1.706614  |
| H | -7.030266 | -2.116260 | -1.912137 |
| H | -7.489222 | -1.789255 | 0.729396  |
| H | -3.311672 | -1.710776 | 0.057494  |
| H | -0.630716 | 0.780112  | 1.661279  |
| H | -0.456223 | 1.178823  | 3.380331  |
| H | 0.312712  | 2.205994  | 2.142693  |
| H | -2.514373 | 4.323598  | 3.335244  |
| H | -1.612057 | 3.195059  | 4.368164  |
| H | -0.756795 | 4.191963  | 3.173611  |
| H | -5.187825 | 2.529980  | -1.491393 |

|   |           |           |           |
|---|-----------|-----------|-----------|
| H | -5.348302 | 2.759255  | -3.249969 |
| H | -4.992909 | 4.136090  | -2.178915 |
| H | -1.713983 | 3.662852  | -3.862268 |
| H | -3.299378 | 3.455584  | -4.632189 |
| H | -3.024124 | 4.798338  | -3.504247 |
| H | -2.422101 | -3.182307 | -1.590178 |
| H | -3.656791 | -4.252533 | -2.281383 |
| H | -2.482734 | -3.448818 | -3.342374 |
| H | -5.700025 | -1.587424 | -3.959860 |
| H | -5.577812 | -3.331339 | -3.644196 |
| H | -4.401024 | -2.527905 | -4.710373 |
| H | -7.031836 | -1.109975 | 2.942988  |
| H | -6.000774 | -1.693795 | 4.260226  |
| H | -6.575140 | -2.820976 | 3.010301  |
| H | -3.652961 | -2.429019 | 3.857873  |
| H | -4.223502 | -3.565150 | 2.612041  |
| H | -2.934567 | -2.408729 | 2.237107  |
| H | -1.098675 | 5.151835  | 1.047385  |
| H | -1.802979 | 5.316935  | -1.555461 |
| H | -2.902207 | 1.529335  | -0.087191 |
| N | 5.471867  | 0.311439  | 0.213833  |
| C | 5.038560  | -0.410229 | 1.500636  |
| C | 4.308483  | 0.415364  | -0.797289 |
| C | 6.045066  | 1.674581  | 0.579518  |
| C | 6.593466  | -0.521229 | -0.419309 |
| C | 6.731908  | 2.455320  | -0.544518 |
| C | 6.277325  | -1.981741 | -0.743210 |
| C | 3.369283  | 1.617553  | -0.684603 |
| C | 4.014636  | 0.272793  | 2.405323  |
| C | 7.436145  | -2.605281 | -1.542098 |
| C | 7.193846  | -4.086394 | -1.851272 |
| C | 3.836558  | -0.563008 | 3.687576  |
| C | 2.813941  | 0.054003  | 4.646835  |
| C | 2.273108  | 1.520706  | -1.762815 |
| C | 1.331546  | 2.727901  | -1.739508 |
| C | 7.029189  | 3.895884  | -0.091634 |
| C | 7.769887  | 4.705306  | -1.160736 |
| H | 5.969892  | -0.583737 | 2.050458  |
| H | 4.630247  | -1.371295 | 1.181740  |

|   |           |           |           |
|---|-----------|-----------|-----------|
| H | 4.777641  | 0.420615  | -1.784478 |
| H | 3.746302  | -0.517633 | -0.695820 |
| H | 6.750346  | 1.489911  | 1.396084  |
| H | 5.217998  | 2.255506  | 0.985123  |
| H | 7.438075  | -0.457660 | 0.274991  |
| H | 6.872481  | 0.005484  | -1.333486 |
| H | 6.101406  | 2.484042  | -1.441209 |
| H | 7.673464  | 1.974077  | -0.831667 |
| H | 5.350930  | -2.066580 | -1.320583 |
| H | 6.122990  | -2.561037 | 0.172247  |
| H | 3.913181  | 2.559674  | -0.823707 |
| H | 2.893119  | 1.664057  | 0.298938  |
| H | 3.047123  | 0.338041  | 1.898677  |
| H | 4.318452  | 1.289613  | 2.681374  |
| H | 8.374237  | -2.495501 | -0.979209 |
| H | 7.573120  | -2.050470 | -2.481002 |
| H | 7.094150  | -4.672277 | -0.930560 |
| H | 8.024822  | -4.505464 | -2.428481 |
| H | 6.274971  | -4.224582 | -2.431743 |
| H | 4.806137  | -0.661902 | 4.196419  |
| H | 3.520417  | -1.576252 | 3.409927  |
| H | 3.119346  | 1.057923  | 4.966449  |
| H | 2.702251  | -0.562595 | 5.544754  |
| H | 1.827995  | 0.138672  | 4.176068  |
| H | 1.697249  | 0.599902  | -1.612032 |
| H | 2.744024  | 1.434761  | -2.752772 |
| H | 0.843676  | 2.846380  | -0.766143 |
| H | 0.534632  | 2.610813  | -2.478785 |
| H | 1.869001  | 3.658337  | -1.963087 |
| H | 7.625862  | 3.872268  | 0.830724  |
| H | 6.086225  | 4.397904  | 0.163556  |
| H | 8.735324  | 4.248457  | -1.408624 |
| H | 7.963126  | 5.725464  | -0.813699 |
| H | 7.184049  | 4.772928  | -2.084982 |
| C | -0.446905 | -1.259896 | -0.155268 |
| C | -0.002663 | -2.361096 | 0.728053  |
| O | -1.646755 | -1.228165 | 0.534687  |
| I | 2.456041  | -3.121191 | 0.170197  |
| H | 0.167161  | -0.348070 | -0.063177 |



|   |           |           |           |
|---|-----------|-----------|-----------|
| H | -0.525464 | -1.531927 | -1.216594 |
| H | -0.438649 | -3.337796 | 0.561389  |
| H | 0.214393  | -2.110166 | 1.757803  |

Cartesian coordinates of transition state **II\_TS** in a partial cone conformation.

|   |           |           |           |
|---|-----------|-----------|-----------|
| C | -2.635268 | 4.215671  | 1.363443  |
| C | -3.427593 | 3.676823  | 2.412057  |
| C | -3.207389 | 2.311894  | 2.452917  |
| N | -2.298073 | 2.018718  | 1.450562  |
| C | -1.945331 | 3.173360  | 0.772235  |
| C | -0.956185 | 3.194594  | -0.388243 |
| C | -3.189098 | -0.109978 | -3.515570 |
| C | -3.373046 | -1.322777 | 3.406978  |
| C | -3.903665 | -2.330472 | 2.551439  |
| C | -4.650393 | -1.703131 | 1.571913  |
| N | -4.593777 | -0.350082 | 1.833455  |
| C | -3.803395 | -0.095395 | 2.937508  |
| C | -3.634954 | 1.299333  | 3.505190  |
| C | -5.513401 | -2.265452 | 0.458413  |
| C | -3.712527 | 0.034788  | -4.959062 |
| C | -2.086746 | -1.200287 | -3.523217 |
| C | 0.276266  | 2.321515  | -0.033489 |
| C | -0.463237 | 4.640615  | -0.594350 |
| C | -4.977554 | 1.748309  | 4.138647  |
| C | -2.560477 | 1.265696  | 4.621978  |
| C | -5.090707 | -3.727425 | 0.167811  |
| C | -6.990605 | -2.271814 | 0.927477  |
| C | -2.573410 | 2.454540  | -3.708901 |
| C | -1.938227 | 3.381998  | -2.836055 |
| C | -1.593346 | 2.704064  | -1.680262 |
| N | -1.996031 | 1.394232  | -1.845774 |
| C | -2.605742 | 1.225765  | -3.072550 |
| C | -6.363822 | -1.041569 | -1.712288 |
| C | -5.706551 | -0.479688 | -2.839875 |
| C | -4.342722 | -0.547876 | -2.617480 |
| N | -4.164881 | -1.143397 | -1.380733 |
| C | -5.391408 | -1.449819 | -0.817407 |
| H | -2.579071 | 5.256814  | 1.077806  |
| H | -4.064006 | 4.237858  | 3.082599  |

|   |           |           |           |
|---|-----------|-----------|-----------|
| H | -2.069730 | 1.070605  | 1.145259  |
| H | -2.751137 | -1.486249 | 4.276126  |
| H | -3.757006 | -3.396956 | 2.652158  |
| H | -4.958038 | 0.358030  | 1.210429  |
| H | -4.486228 | 0.804611  | -5.031735 |
| H | -4.138620 | -0.912909 | -5.302401 |
| H | -2.893751 | 0.313775  | -5.630789 |
| H | -1.652546 | -1.343967 | -2.530973 |
| H | -2.501128 | -2.159531 | -3.854161 |
| H | -1.279442 | -0.913917 | -4.207409 |
| H | -0.000230 | 1.271417  | 0.096127  |
| H | 0.736662  | 2.672990  | 0.898267  |
| H | 1.016861  | 2.385330  | -0.841303 |
| H | -1.287070 | 5.311365  | -0.853187 |
| H | 0.007301  | 5.016254  | 0.320149  |
| H | 0.267725  | 4.677249  | -1.409630 |
| H | -5.768793 | 1.818074  | 3.385442  |
| H | -5.289153 | 1.022944  | 4.897261  |
| H | -4.879557 | 2.727432  | 4.620667  |
| H | -1.594489 | 0.935831  | 4.225955  |
| H | -2.853121 | 0.585973  | 5.430809  |
| H | -2.434257 | 2.268632  | 5.041355  |
| H | -4.043515 | -3.781568 | -0.145565 |
| H | -5.710697 | -4.137424 | -0.635810 |
| H | -5.216913 | -4.358308 | 1.055463  |
| H | -7.640342 | -2.726229 | 0.170988  |
| H | -7.081724 | -2.849779 | 1.852616  |
| H | -7.349419 | -1.255970 | 1.122572  |
| H | -2.972772 | 2.672609  | -4.689518 |
| H | -1.773077 | 4.432544  | -3.032150 |
| H | -1.848187 | 0.656265  | -1.155340 |
| H | -7.431495 | -1.159897 | -1.588906 |
| H | -6.185818 | -0.077443 | -3.721336 |
| H | -3.279972 | -1.208051 | -0.869899 |
| N | 4.969831  | 0.439517  | -0.496382 |
| C | 5.316541  | -0.980009 | -0.994739 |
| C | 3.920644  | 0.412371  | 0.627273  |
| C | 6.244743  | 1.154570  | -0.068975 |
| C | 4.367669  | 1.208193  | -1.681442 |

|   |           |           |           |
|---|-----------|-----------|-----------|
| C | 6.104367  | 2.607869  | 0.388973  |
| C | 3.145168  | 0.596876  | -2.366549 |
| C | 4.355138  | -0.087533 | 2.003664  |
| C | 6.375263  | -1.782145 | -0.235403 |
| C | 2.696555  | 1.503147  | -3.529089 |
| C | 1.439818  | 0.977543  | -4.230187 |
| C | 6.490423  | -3.184843 | -0.862531 |
| C | 7.549567  | -4.045274 | -0.166613 |
| C | 3.207647  | 0.121192  | 3.009606  |
| C | 3.562103  | -0.393392 | 4.407981  |
| C | 7.462146  | 3.144478  | 0.877591  |
| C | 7.384188  | 4.605616  | 1.331654  |
| C | -0.763485 | -1.360585 | 0.950151  |
| C | -0.055497 | -1.745185 | -0.279553 |
| O | -1.641612 | -0.675686 | 0.105775  |
| I | 2.208803  | -3.159456 | 0.237871  |
| H | 5.647642  | -0.845425 | -2.028858 |
| H | 4.373093  | -1.532397 | -0.996223 |
| H | 3.544231  | 1.435849  | 0.698260  |
| H | 3.117113  | -0.229828 | 0.262929  |
| H | 6.921572  | 1.089810  | -0.927025 |
| H | 6.676115  | 0.558424  | 0.733977  |
| H | 5.186564  | 1.323168  | -2.399115 |
| H | 4.112273  | 2.198582  | -1.301490 |
| H | 5.376164  | 2.687920  | 1.204470  |
| H | 5.746196  | 3.247027  | -0.425503 |
| H | 2.317422  | 0.494823  | -1.658066 |
| H | 3.363601  | -0.404247 | -2.751828 |
| H | 5.248347  | 0.435976  | 2.367102  |
| H | 4.581075  | -1.156584 | 1.960138  |
| H | 6.110066  | -1.890372 | 0.819870  |
| H | 7.355377  | -1.292052 | -0.280249 |
| H | 3.517785  | 1.596062  | -4.254202 |
| H | 2.501423  | 2.515310  | -3.148638 |
| H | 1.599864  | -0.032746 | -4.625619 |
| H | 1.164225  | 1.626900  | -5.067079 |
| H | 0.584667  | 0.946991  | -3.547285 |
| H | 6.737891  | -3.088245 | -1.929181 |
| H | 5.513977  | -3.681098 | -0.808639 |

|   |           |           |           |
|---|-----------|-----------|-----------|
| H | 8.543810  | -3.584779 | -0.223395 |
| H | 7.612732  | -5.034485 | -0.631592 |
| H | 7.306414  | -4.191991 | 0.892242  |
| H | 2.316468  | -0.402823 | 2.643620  |
| H | 2.952281  | 1.189061  | 3.060395  |
| H | 3.769925  | -1.469204 | 4.389491  |
| H | 2.733564  | -0.226879 | 5.103993  |
| H | 4.445951  | 0.116117  | 4.812164  |
| H | 8.203631  | 3.048609  | 0.072492  |
| H | 7.823430  | 2.520211  | 1.706160  |
| H | 7.060898  | 5.259971  | 0.513574  |
| H | 8.361171  | 4.960034  | 1.675919  |
| H | 6.674344  | 4.727878  | 2.158090  |
| H | -1.216315 | -2.187152 | 1.506927  |
| H | -0.186746 | -0.721359 | 1.635995  |
| H | 0.509910  | -0.988327 | -0.802431 |
| H | -0.473328 | -2.540429 | -0.881007 |

Cartesian coordinates of transition state **II**\_TS in a cone conformation.

|   |          |           |           |
|---|----------|-----------|-----------|
| C | 1.777063 | 2.879888  | 3.261537  |
| C | 1.553007 | 3.701447  | 2.122234  |
| C | 1.532100 | 2.885390  | 1.006465  |
| N | 1.728132 | 1.590498  | 1.455978  |
| C | 1.890335 | 1.570460  | 2.830786  |
| C | 2.105840 | 0.290974  | 3.633335  |
| C | 1.339210 | 3.233996  | -0.464989 |
| C | 0.919173 | -0.682888 | 3.405402  |
| C | 2.122453 | 0.652107  | 5.132823  |
| C | 0.927989 | 4.716259  | -0.570382 |
| C | 0.185395 | 2.384353  | -1.063107 |
| C | 5.475338 | -1.361196 | 3.298730  |
| C | 4.565378 | -0.561283 | 4.042394  |
| C | 3.414524 | -0.410752 | 3.291688  |
| N | 3.617424 | -1.107453 | 2.112123  |
| C | 4.871164 | -1.691619 | 2.101006  |
| C | 6.971181 | -0.440317 | -1.785591 |
| C | 7.107810 | -1.340149 | -0.692147 |
| C | 5.841598 | -1.627908 | -0.219218 |
| N | 4.951436 | -0.923617 | -1.006807 |

|   |           |           |           |
|---|-----------|-----------|-----------|
| C | 5.623601  | -0.189425 | -1.966608 |
| C | 5.383800  | -2.518766 | 0.928050  |
| C | 4.906683  | 0.650051  | -3.016380 |
| C | 6.579234  | -3.367382 | 1.405634  |
| C | 4.280567  | -3.493354 | 0.436588  |
| C | 3.877582  | -0.232385 | -3.774084 |
| C | 5.943993  | 1.141499  | -4.045734 |
| C | 3.467362  | 3.937031  | -1.858640 |
| C | 4.465407  | 3.213309  | -2.567657 |
| C | 4.200879  | 1.864171  | -2.422071 |
| N | 3.061653  | 1.765256  | -1.643511 |
| C | 2.604083  | 3.021313  | -1.287617 |
| H | 1.853144  | 3.218993  | 4.284895  |
| H | 1.431551  | 4.775556  | 2.125341  |
| H | 1.802778  | 0.781893  | 0.845202  |
| H | 0.831732  | -0.981899 | 2.357980  |
| H | -0.024657 | -0.206811 | 3.697524  |
| H | 1.052611  | -1.592226 | 4.002193  |
| H | 2.934152  | 1.346429  | 5.368120  |
| H | 1.176752  | 1.123211  | 5.420318  |
| H | 2.258719  | -0.251358 | 5.734767  |
| H | 1.702693  | 5.374512  | -0.167314 |
| H | 0.761942  | 4.987589  | -1.617639 |
| H | 0.004827  | 4.895591  | -0.009070 |
| H | 0.401913  | 1.313599  | -1.014215 |
| H | 0.027371  | 2.648415  | -2.115407 |
| H | -0.745043 | 2.568190  | -0.510607 |
| H | 6.463912  | -1.663057 | 3.614856  |
| H | 4.737079  | -0.152316 | 5.028105  |
| H | 2.966336  | -1.153993 | 1.335317  |
| H | 7.777558  | -0.030778 | -2.377602 |
| H | 8.036166  | -1.732859 | -0.301586 |
| H | 3.945065  | -0.921163 | -0.863370 |
| H | 7.401385  | -2.738877 | 1.760008  |
| H | 6.955394  | -3.985122 | 0.583775  |
| H | 6.272949  | -4.022713 | 2.227241  |
| H | 3.395499  | -2.965867 | 0.066239  |
| H | 4.664358  | -4.111922 | -0.382349 |
| H | 3.962903  | -4.151335 | 1.253676  |

|   |           |           |           |
|---|-----------|-----------|-----------|
| H | 3.109085  | -0.633219 | -3.106414 |
| H | 4.383645  | -1.083334 | -4.243642 |
| H | 3.373270  | 0.352554  | -4.552013 |
| H | 6.445817  | 0.287742  | -4.511592 |
| H | 5.451857  | 1.727298  | -4.828552 |
| H | 6.706162  | 1.769973  | -3.575610 |
| H | 3.390510  | 5.013065  | -1.788058 |
| H | 5.281185  | 3.641663  | -3.132585 |
| H | 2.661888  | 0.893136  | -1.303871 |
| N | -5.686114 | 0.073823  | -0.374128 |
| C | -5.028919 | -0.185893 | -1.740424 |
| C | -4.655573 | 0.013560  | 0.774033  |
| C | -6.423137 | 1.405690  | -0.422803 |
| C | -6.722316 | -1.035969 | -0.151982 |
| C | -7.322453 | 1.737402  | 0.771216  |
| C | -6.219959 | -2.478603 | -0.221830 |
| C | -3.895795 | 1.295277  | 1.123943  |
| C | -4.050452 | 0.852777  | -2.284471 |
| C | -7.329349 | -3.443696 | 0.233721  |
| C | -6.898484 | -4.910355 | 0.127599  |
| C | -3.615523 | 0.439248  | -3.703741 |
| C | -2.620700 | 1.428223  | -4.318977 |
| C | -2.925361 | 1.018765  | 2.288804  |
| C | -2.169603 | 2.276147  | 2.729952  |
| C | -7.799493 | 3.198570  | 0.692840  |
| C | -8.750484 | 3.566996  | 1.835937  |
| C | 1.122269  | -1.440612 | -1.390708 |
| C | 0.278001  | -1.567537 | -0.207006 |
| O | 1.973313  | -0.791881 | -0.467063 |
| I | -2.165678 | -2.762304 | -0.859873 |
| H | -5.867676 | -0.311182 | -2.433572 |
| H | -4.502463 | -1.137554 | -1.642437 |
| H | -5.214863 | -0.318631 | 1.652396  |
| H | -3.954525 | -0.780652 | 0.498779  |
| H | -7.012978 | 1.383994  | -1.344688 |
| H | -5.660203 | 2.174113  | -0.540278 |
| H | -7.503206 | -0.866309 | -0.900837 |
| H | -7.155348 | -0.843513 | 0.831134  |
| H | -6.788097 | 1.584371  | 1.716512  |

|   |           |           |           |
|---|-----------|-----------|-----------|
| H | -8.198958 | 1.080252  | 0.790586  |
| H | -5.333137 | -2.621069 | 0.404274  |
| H | -5.918390 | -2.737233 | -1.241461 |
| H | -4.582865 | 2.094251  | 1.427500  |
| H | -3.326413 | 1.669897  | 0.268476  |
| H | -3.159021 | 0.899217  | -1.652029 |
| H | -4.489562 | 1.856989  | -2.322204 |
| H | -8.233107 | -3.280957 | -0.371085 |
| H | -7.608222 | -3.215670 | 1.272203  |
| H | -6.656140 | -5.178174 | -0.907012 |
| H | -7.696945 | -5.577279 | 0.469657  |
| H | -6.008943 | -5.106636 | 0.736255  |
| H | -4.502318 | 0.359354  | -4.348662 |
| H | -3.164440 | -0.559653 | -3.657948 |
| H | -3.051261 | 2.434029  | -4.398841 |
| H | -2.327911 | 1.109738  | -5.324805 |
| H | -1.709165 | 1.500632  | -3.714919 |
| H | -2.211816 | 0.240954  | 1.989403  |
| H | -3.489025 | 0.608464  | 3.138900  |
| H | -1.561676 | 2.689871  | 1.918338  |
| H | -1.482824 | 2.052742  | 3.551482  |
| H | -2.861866 | 3.056573  | 3.070592  |
| H | -8.300022 | 3.367279  | -0.270615 |
| H | -6.927661 | 3.866511  | 0.708556  |
| H | -9.650841 | 2.941438  | 1.822259  |
| H | -9.069046 | 4.611414  | 1.757311  |
| H | -8.267879 | 3.438166  | 2.811916  |
| H | 1.515065  | -2.378541 | -1.797824 |
| H | 0.735441  | -0.799455 | -2.191218 |
| H | -0.276715 | -0.708259 | 0.134852  |
| H | 0.476697  | -2.361328 | 0.497856  |
